# Supplementary material for: Comparative stigmatic transcriptomics reveals self and cross pollination responses to heteromorphic incompatibility in Plumbago auriculata Lam
Source: Front Genet. 2024 Mar 6;15:1372644. doi: 10.3389/fgene.2024.1372644 (PMC10953596; doi:10.3389/fgene.2024.1372644)
Supplement: Supplementary file 3 [file Table2.XLS]

## Sheet: Sheet1
Table S2: qRT‒PCR and RNA-seq values of DEGs related to self-incompatibility, signal transduction, ABC transporters, plant‒pathogen interaction and lipid transport and metabolism
Pathway	Gene No.	Gene name	T×P-qPCR-1	T×P-qPCR-2	T×P-qPCR-3	T×T-qPCR-1	T×T-qPCR-2	T×T-qPCR-3	P×T-qPCR-1	P×T-qPCR-2	P×T-qPCR-3	P×P-qPCR-1	P×P-qPCR-2	P×P-qPCR-3	T×P-RNAseq-1	T×P-RNAseq-2	T×P-RNAseq-3	T×T-RNAseq-1	T×T-RNAseq-2	T×T-RNAseq-3	P×T-RNAseq-1	P×T-RNAseq-2	P×T-RNAseq-3	P×P-RNAseq-1	P×P-RNAseq-2	P×P-RNAseq-3
self-incompatibility	g.244950	Self-incomp_S1	4.37717	3.43426	3.29436	1	1.00696	0.790041	1.69349	1.13288	1.23114	0.566442	1.11729	0.965936	275.47	312.32	298.84	125.43	92.3	114.55	166.83	154.76	158.13	89.06	88.61	98.3
	g.31658	Self-incomp_S1	2.78949	2.2974	0.840896	1	0.784584	0.496546	2.31338	1.71713	1.94531	0.423373	0.846745	0.578344	48.95	48.36	59.29	19.21	14.2	13.18	45.37	59.7	53.27	13.8	17.07	16.7
	g.21343	Self-incomp_S1	2	1.10191	0.90125	1	0.550953	0.784584	0.732043	0.50698	0.582367	0.303549	0.959264	0.503478	253.17	276.63	245.04	152.51	130.19	147.76	119.56	122.17	119.18	118.61	110.82	116.1
signal transduction	g.225308	GDI	3.75809	20.9663	10.4107	1	0.933033	2.18859	9.57983	17.1484	53.4456	21.1121	8.05564	2.62079	19.33	17.6	18.71	0.79	0.64	0.52	12.14	15.97	15.56	2.49	4.58	4.19
	g.123279	SAPK2	0.366021	0.303549	0.131215	1	0.586417	0.532185	0.222211	0.157127	0.262429	0.244855	0.61132	0.106579	25.17	23.42	23.03	48.62	41.68	45.07	21.5	21.78	22.08	23.48	24.7	24.32
	g.127811	PUB19	4.11246	4.02782	1.47427	1	0.582367	0.524858	2.46229	1.47427	1.6245	0.687771	1.43396	1.11729	24.26	21.21	22.45	7.51	6.14	6.68	15.35	17.1	16.78	7.76	8.5	7.75
	g.184704	P2C76	1.64718	1.71713	1.22264	1	0.574349	0.466516	1.43396	0.784584	0.888843	0.574349	1.17283	0.933033	11.59	9.53	8.6	1.25	0.96	0.89	9.55	14.91	10.4	4.82	5.63	6.39
	g.148390	PLDD1	2.11404	2.07053	1.67018	1	0.946058	0.503478	2.60268	2.01391	1.98618	0.381565	0.493116	0.607097	9.78	11.22	10.94	4.75	4.73	4.05	7.2	10.25	7.83	1.98	2.67	2.3
ABC transporters	g.153399	ABCG1	1.26576	0.63728	0.993092	1	0.429283	0.336808	0.236514	0.30566	0.406126	4.02782	1.38511	1.31951	9.18	10.06	8.66	2.39	1.84	2.77	4.64	5.51	5.08	11.49	11.84	12.14
	g.54574	ABCC10	0.482968	6.86852	5.38893	1	0.790041	0.913831	0.721965	0.219151	0.673617	60.9688	33.8246	3.53081	6.4	6.61	6.5	1.99	2.39	1.92	5.36	6.23	5.34	34.61	33.17	36.88
	g.87588	ABCG5	0.343885	0.423373	0.248273	1	1.04247	0.926588	0.503478	0.323088	0.721965	1.8025	0.716978	0.852635	43.94	48.16	44.41	55.34	52.08	55.07	41.53	42.21	42.63	93.31	87	89.64
plant‒pathogen interaction	g.116435	KCS12	2.15846	3.01049	0.752623	1	1.27456	0.965936	0.521233	0.539614	0.463294	0.97942	1.15669	0.920188	32.9	34.16	31.2	11.35	12.72	13.16	7.78	6.81	6.79	16.49	14.98	15.7
	g.33756	CML16	3.05252	2.36199	0.846745	1	0.840896	0.673617	3.24901	1.95884	2.39496	0.532185	0.702222	0.757858	34.61	36.49	35.11	16.06	18.02	13.33	38.72	49.81	47.22	5.96	9.43	10.53
lipid transport and metabolism	g.163007	FAR	3.65533	3.4822	0.823591	1	0.90125	0.493116	0.0842021	1.07177	0.0382075	6.72717	5.77572	5.81589	13.08	13.22	12.58	4.8	3.58	3.97	0.35	0.41	0.31	45.49	35.37	31.61
	g.236952	HIDM	37.5307	35.0174	2.23457	1	1.10191	2.07053	1.28343	6.77396	11.1579	22.4711	38.0546	91.7731	19.2	23.51	17.48	6.39	8.12	7.29	5.27	7.72	5.36	45.04	43.81	46.41
