# Supplementary material for: Comparative stigmatic transcriptomics reveals self and cross pollination responses to heteromorphic incompatibility in Plumbago auriculata Lam
Source: Front Genet. 2024 Mar 6;15:1372644. doi: 10.3389/fgene.2024.1372644 (PMC10953596; doi:10.3389/fgene.2024.1372644)
Supplement: Supplementary file 7 [file Table3.XLS]

## Sheet: P-T1_P-T2_P-T3_vs_P-P1_P-P2_P-P
Table S3: Genes in specific KEGG pathways among stigmas of different P. auriculata pollination.
#KEGG_n	412	KEGG_N	16445
#Pathway	ko_ID	DEgene	gene	DEgene_all	gene_all	Gene_id	KOs
Proteasome	ko03050	1	154	412	16445	BMK_Unigene_048064	K06699
Two-component system	ko02020	3	32	412	16445	BMK_Unigene_047063;BMK_Unigene_063567;BMK_Unigene_086291	K00990+K00990+K00990
Phosphatidylinositol signaling system	ko04070	6	262	412	16445	BMK_Unigene_014862;BMK_Unigene_017512;BMK_Unigene_018526;BMK_Unigene_066227;BMK_Unigene_071012;BMK_Unigene_088146	K00901+K19662+K05857+K13711+K13024+K00889
Fatty acid elongation	ko00062	2	97	412	16445	BMK_Unigene_020665;BMK_Unigene_043266	K15397+K15397
Brassinosteroid biosynthesis	ko00905	1	26	412	16445	BMK_Unigene_010311	K20623
Phenylalanine metabolism	ko00360	3	112	412	16445	BMK_Unigene_045329;BMK_Unigene_065202;BMK_Unigene_069205	K00276+K00276+K00815
Glycolysis / Gluconeogenesis	ko00010	7	427	412	16445	BMK_Unigene_005005;BMK_Unigene_020200;BMK_Unigene_045172;BMK_Unigene_045890;BMK_Unigene_068605;BMK_Unigene_069760;BMK_Unigene_084496	K01785+K00873+K01568+K00873+K01785+K01792+K00128
Pantothenate and CoA biosynthesis	ko00770	2	137	412	16445	BMK_Unigene_084496;BMK_Unigene_090099	K00128+K01653
Lysine degradation	ko00310	2	153	412	16445	BMK_Unigene_016037;BMK_Unigene_084496	K11420+K00128
Spliceosome	ko03040	7	605	412	16445	BMK_Unigene_015550;BMK_Unigene_016345;BMK_Unigene_016348;BMK_Unigene_022657;BMK_Unigene_023233;BMK_Unigene_045257;BMK_Unigene_071730	K12900+K03283+K03283+K12900+K12818+K12835+K12835
Biotin metabolism	ko00780	2	28	412	16445	BMK_Unigene_022701;BMK_Unigene_071065	K19562+K19562
Limonene and pinene degradation	ko00903	1	31	412	16445	BMK_Unigene_084496	K00128
Glycosylphosphatidylinositol (GPI)-anchor biosynthesis	ko00563	3	76	412	16445	BMK_Unigene_011126;BMK_Unigene_023932;BMK_Unigene_062555	K03860+K03860+K03860
Circadian rhythm - plant	ko04712	4	180	412	16445	BMK_Unigene_046169;BMK_Unigene_068445;BMK_Unigene_069247;BMK_Unigene_087690	K16240+K12133+K03097+K12133
Glycerophospholipid metabolism	ko00564	11	317	412	16445	BMK_Unigene_014862;BMK_Unigene_016106;BMK_Unigene_016107;BMK_Unigene_019216;BMK_Unigene_025453;BMK_Unigene_041530;BMK_Unigene_049010;BMK_Unigene_066896;BMK_Unigene_070342;BMK_Unigene_071130;BMK_Unigene_086852	K00901+K01115+K01115+K00993+K14156+K01047+K01115+K01126+K01115+K01115+K14674
Starch and sucrose metabolism	ko00500	22	586	412	16445	BMK_Unigene_002729;BMK_Unigene_007495;BMK_Unigene_010027;BMK_Unigene_010914;BMK_Unigene_016760;BMK_Unigene_022787;BMK_Unigene_042081;BMK_Unigene_063311;BMK_Unigene_064043;BMK_Unigene_066907;BMK_Unigene_069626;BMK_Unigene_071771;BMK_Unigene_073558;BMK_Unigene_080974;BMK_Unigene_081155;BMK_Unigene_081771;BMK_Unigene_087333;BMK_Unigene_089223;BMK_Unigene_089252;BMK_Unigene_090631;BMK_Unigene_091010;…	K01188+K01179+K01210+K01176+K19891+K19891+K19892+K01176+K00688+K00705+K01176+K01188+K19891+K05350+K19893+K00963+K13679+K01087+K19892+K00696+K01177+K19892
Galactose metabolism	ko00052	11	309	412	16445	BMK_Unigene_005005;BMK_Unigene_015127;BMK_Unigene_015323;BMK_Unigene_017658;BMK_Unigene_019370;BMK_Unigene_024000;BMK_Unigene_048038;BMK_Unigene_062703;BMK_Unigene_068605;BMK_Unigene_069006;BMK_Unigene_081771	K01785+K06617+K12309+K04618+K04618+K12309+K12309+K06617+K01785+K06617+K00963
Citrate cycle (TCA cycle)	ko00020	3	209	412	16445	BMK_Unigene_018377;BMK_Unigene_047060;BMK_Unigene_068515	K01679+K01679+K01679
Thiamine metabolism	ko00730	4	68	412	16445	BMK_Unigene_065200;BMK_Unigene_067930;BMK_Unigene_068996;BMK_Unigene_081777	K22911+K22911+K22911+K00939
Homologous recombination	ko03440	4	197	412	16445	BMK_Unigene_000596;BMK_Unigene_009606;BMK_Unigene_013340;BMK_Unigene_022933	K02327+K10683+K12173+K12173
Riboflavin metabolism	ko00740	2	65	412	16445	BMK_Unigene_018961;BMK_Unigene_046220	K14652+K14652
Nitrogen metabolism	ko00910	4	90	412	16445	BMK_Unigene_010586;BMK_Unigene_014581;BMK_Unigene_034813;BMK_Unigene_037506	K00261+K01673+K01915+K01915
Peptidoglycan biosynthesis	ko00550	1	6	412	16445	BMK_Unigene_069725	K01921
Biosynthesis of various secondary metabolites - part 2	ko00998	1	8	412	16445	BMK_Unigene_013651	K21272
Pyrimidine metabolism	ko00240	4	180	412	16445	BMK_Unigene_017905;BMK_Unigene_020659;BMK_Unigene_066860;BMK_Unigene_066893	K01937+K01465+K00876+K01510
Carbon metabolism	ko01200	10	955	412	16445	BMK_Unigene_010586;BMK_Unigene_018377;BMK_Unigene_020200;BMK_Unigene_040720;BMK_Unigene_045890;BMK_Unigene_047060;BMK_Unigene_067421;BMK_Unigene_068515;BMK_Unigene_084481;BMK_Unigene_088372	K00261+K01679+K00873+K00029+K00873+K01679+K00029+K01679+K11517+K03781
Fatty acid metabolism	ko01212	2	242	412	16445	BMK_Unigene_002587;BMK_Unigene_067610	K00645+K01897
Folate biosynthesis	ko00790	4	76	412	16445	BMK_Unigene_018961;BMK_Unigene_021066;BMK_Unigene_040099;BMK_Unigene_046220	K14652+K15631+K00079+K14652
Benzoxazinoid biosynthesis	ko00402	6	25	412	16445	BMK_Unigene_018553;BMK_Unigene_021600;BMK_Unigene_022872;BMK_Unigene_035340;BMK_Unigene_085998;BMK_Unigene_087960	K13229+K13229+K13229+K13229+K13229+K13229
Glycerolipid metabolism	ko00561	6	275	412	16445	BMK_Unigene_014862;BMK_Unigene_067842;BMK_Unigene_069078;BMK_Unigene_084496;BMK_Unigene_084723;BMK_Unigene_086852	K00901+K01054+K01046+K00128+K00679+K14674
mTOR signaling pathway	ko04150	1	45	412	16445	BMK_Unigene_017512	K19662
Monobactam biosynthesis	ko00261	1	26	412	16445	BMK_Unigene_071486	K00215
Fatty acid degradation	ko00071	3	198	412	16445	BMK_Unigene_021583;BMK_Unigene_067610;BMK_Unigene_084496	K07517+K01897+K00128
Arachidonic acid metabolism	ko00590	3	69	412	16445	BMK_Unigene_040099;BMK_Unigene_041530;BMK_Unigene_086852	K00079+K01047+K14674
Alanine, aspartate and glutamate metabolism	ko00250	6	192	412	16445	BMK_Unigene_010586;BMK_Unigene_016280;BMK_Unigene_034813;BMK_Unigene_037506;BMK_Unigene_064235;BMK_Unigene_090896	K00261+K00827+K01915+K01915+K00827+K01953
Endocytosis	ko04144	14	617	412	16445	BMK_Unigene_008932;BMK_Unigene_016106;BMK_Unigene_016107;BMK_Unigene_016345;BMK_Unigene_016348;BMK_Unigene_036291;BMK_Unigene_042007;BMK_Unigene_046187;BMK_Unigene_049010;BMK_Unigene_066760;BMK_Unigene_070342;BMK_Unigene_071130;BMK_Unigene_088146;BMK_Unigene_092161	K12472+K01115+K01115+K03283+K03283+K12198+K19476+K07904+K01115+K19476+K01115+K01115+K00889+K12471
Linoleic acid metabolism	ko00591	4	51	412	16445	BMK_Unigene_018750;BMK_Unigene_035730;BMK_Unigene_041530;BMK_Unigene_086852	K00454+K15718+K01047+K14674
Terpenoid backbone biosynthesis	ko00900	2	146	412	16445	BMK_Unigene_010908;BMK_Unigene_043768	K00787+K00021
Carbon fixation in photosynthetic organisms	ko00710	2	235	412	16445	BMK_Unigene_040720;BMK_Unigene_067421	K00029+K00029
Oxidative phosphorylation	ko00190	7	495	412	16445	BMK_Unigene_016256;BMK_Unigene_017225;BMK_Unigene_038725;BMK_Unigene_043045;BMK_Unigene_049619;BMK_Unigene_093332;BMK_Unigene_101600	K05584+K02256+K02115+K01535+K01535+K02126+K03953
Photosynthesis	ko00195	2	162	412	16445	BMK_Unigene_038725;BMK_Unigene_064018	K02115+K02639
Valine, leucine and isoleucine degradation	ko00280	7	207	412	16445	BMK_Unigene_014539;BMK_Unigene_016280;BMK_Unigene_022948;BMK_Unigene_064235;BMK_Unigene_084496;BMK_Unigene_086810;BMK_Unigene_092400	K00020+K00827+K01968+K00827+K00128+K00020+K01968
Histidine metabolism	ko00340	2	82	412	16445	BMK_Unigene_084496;BMK_Unigene_092995	K00128+K01590
Cysteine and methionine metabolism	ko00270	8	319	412	16445	BMK_Unigene_001298;BMK_Unigene_005430;BMK_Unigene_016280;BMK_Unigene_017557;BMK_Unigene_062466;BMK_Unigene_064235;BMK_Unigene_069205;BMK_Unigene_069744	K22846+K01251+K00827+K20772+K01611+K00827+K00815+K01251
Zeatin biosynthesis	ko00908	3	65	412	16445	BMK_Unigene_016675;BMK_Unigene_042134;BMK_Unigene_047827	K23452+K00279+K00279
Flavonoid biosynthesis	ko00941	1	140	412	16445	BMK_Unigene_083161	K05278
Porphyrin and chlorophyll metabolism	ko00860	1	157	412	16445	BMK_Unigene_042525	K13544
Butanoate metabolism	ko00650	1	93	412	16445	BMK_Unigene_090099	K01653
Purine metabolism	ko00230	6	356	412	16445	BMK_Unigene_015999;BMK_Unigene_020200;BMK_Unigene_045890;BMK_Unigene_048734;BMK_Unigene_066893;BMK_Unigene_081777	K18532+K00873+K00873+K01923+K01510+K00939
Diterpenoid biosynthesis	ko00904	3	41	412	16445	BMK_Unigene_018994;BMK_Unigene_019792;BMK_Unigene_035051	K04125+K04125+K13070
Plant hormone signal transduction	ko04075	29	779	412	16445	BMK_Unigene_000394;BMK_Unigene_004289;BMK_Unigene_005364;BMK_Unigene_005715;BMK_Unigene_007891;BMK_Unigene_010267;BMK_Unigene_011202;BMK_Unigene_014402;BMK_Unigene_017707;BMK_Unigene_018661;BMK_Unigene_022511;BMK_Unigene_023190;BMK_Unigene_023478;BMK_Unigene_024092;BMK_Unigene_024236;BMK_Unigene_024300;BMK_Unigene_040777;BMK_Unigene_040914;BMK_Unigene_042042;BMK_Unigene_045824;BMK_Unigene_045988;…	K14487+K16189+K13415+K14432+K13449+K16189+K14492+K14488+K13449+K13449+K14431+K14488+K13416+K14509+K13449+K14431+K14491+K14516+K14497+K14432+K14516+K13449+K14497+K14488+K13449+K13415+K13415+K14504+K13946
Vitamin B6 metabolism	ko00750	1	40	412	16445	BMK_Unigene_090583	K13248
SNARE interactions in vesicular transport	ko04130	2	83	412	16445	BMK_Unigene_044704;BMK_Unigene_081617	K08486+K08486
Tryptophan metabolism	ko00380	5	154	412	16445	BMK_Unigene_019636;BMK_Unigene_019637;BMK_Unigene_069838;BMK_Unigene_084496;BMK_Unigene_088372	K11816+K11816+K22450+K00128+K03781
Vancomycin resistance	ko01502	1	4	412	16445	BMK_Unigene_069725	K01921
Base excision repair	ko03410	2	120	412	16445	BMK_Unigene_000596;BMK_Unigene_069434	K02327+K10798
mRNA surveillance pathway	ko03015	6	325	412	16445	BMK_Unigene_000915;BMK_Unigene_002431;BMK_Unigene_013594;BMK_Unigene_063356;BMK_Unigene_063835;BMK_Unigene_091775	K11584+K13126+K13126+K11584+K11584+K11584
Cyanoamino acid metabolism	ko00460	3	138	412	16445	BMK_Unigene_002729;BMK_Unigene_071771;BMK_Unigene_080974	K01188+K01188+K05350
Ubiquinone and other terpenoid-quinone biosynthesis	ko00130	5	113	412	16445	BMK_Unigene_022451;BMK_Unigene_036267;BMK_Unigene_043275;BMK_Unigene_069205;BMK_Unigene_070223	K05928+K12501+K01904+K00815+K05928
Tyrosine metabolism	ko00350	4	138	412	16445	BMK_Unigene_045329;BMK_Unigene_065202;BMK_Unigene_069205;BMK_Unigene_092610	K00276+K00276+K00815+K00505
Selenocompound metabolism	ko00450	1	56	412	16445	BMK_Unigene_016026	K08247
Amino sugar and nucleotide sugar metabolism	ko00520	16	489	412	16445	BMK_Unigene_001803;BMK_Unigene_020982;BMK_Unigene_021818;BMK_Unigene_039015;BMK_Unigene_047556;BMK_Unigene_047563;BMK_Unigene_049175;BMK_Unigene_049466;BMK_Unigene_064079;BMK_Unigene_069646;BMK_Unigene_072007;BMK_Unigene_072631;BMK_Unigene_081771;BMK_Unigene_087700;BMK_Unigene_089448;BMK_Unigene_089708	K15920+K12373+K01183+K00972+K01183+K01183+K12451+K01209+K20547+K13648+K00770+K15920+K00963+K12373+K01183+K01183
Peroxisome	ko04146	6	315	412	16445	BMK_Unigene_013680;BMK_Unigene_059577;BMK_Unigene_062847;BMK_Unigene_067610;BMK_Unigene_084481;BMK_Unigene_088372	K13336+K13356+K13336+K01897+K11517+K03781
Cutin, suberine and wax biosynthesis	ko00073	5	114	412	16445	BMK_Unigene_016449;BMK_Unigene_018071;BMK_Unigene_019839;BMK_Unigene_048999;BMK_Unigene_059577	K17991+K15405+K15406+K15406+K13356
Protein export	ko03060	1	146	412	16445	BMK_Unigene_042871	K03106
Nucleotide excision repair	ko03420	2	147	412	16445	BMK_Unigene_000596;BMK_Unigene_017741	K02327+K10839
Arginine and proline metabolism	ko00330	3	205	412	16445	BMK_Unigene_013820;BMK_Unigene_062466;BMK_Unigene_084496	K01476+K01611+K00128
alpha-Linolenic acid metabolism	ko00592	5	155	412	16445	BMK_Unigene_004524;BMK_Unigene_018750;BMK_Unigene_041530;BMK_Unigene_041600;BMK_Unigene_086852	K08241+K00454+K01047+K10525+K14674
Bacterial secretion system	ko03070	1	5	412	16445	BMK_Unigene_067005	K11907
Ras signaling pathway	ko04014	1	17	412	16445	BMK_Unigene_047397	K17630
Phenylpropanoid biosynthesis	ko00940	17	352	412	16445	BMK_Unigene_002729;BMK_Unigene_019474;BMK_Unigene_021382;BMK_Unigene_024097;BMK_Unigene_043275;BMK_Unigene_064604;BMK_Unigene_071771;BMK_Unigene_072480;BMK_Unigene_080974;BMK_Unigene_081293;BMK_Unigene_083290;BMK_Unigene_084262;BMK_Unigene_085227;BMK_Unigene_087863;BMK_Unigene_090352;BMK_Unigene_093069;BMK_Unigene_101200	K01188+K18368+K00430+K00430+K01904+K00430+K01188+K00430+K05350+K00430+K18368+K11188+K12356+K22395+K00430+K13066+K00430
Phenylalanine, tyrosine and tryptophan biosynthesis	ko00400	1	155	412	16445	BMK_Unigene_069205	K00815
Glycine, serine and threonine metabolism	ko00260	4	206	412	16445	BMK_Unigene_016280;BMK_Unigene_045329;BMK_Unigene_064235;BMK_Unigene_065202	K00827+K00276+K00827+K00276
Steroid biosynthesis	ko00100	2	82	412	16445	BMK_Unigene_009931;BMK_Unigene_086852	K09832+K14674
D-Alanine metabolism	ko00473	1	4	412	16445	BMK_Unigene_069725	K01921
Other glycan degradation	ko00511	7	172	412	16445	BMK_Unigene_010345;BMK_Unigene_015323;BMK_Unigene_020982;BMK_Unigene_024000;BMK_Unigene_046230;BMK_Unigene_048038;BMK_Unigene_087700	K01192+K12309+K12373+K12309+K17108+K12309+K12373
Wnt signaling pathway	ko04310	1	23	412	16445	BMK_Unigene_017512	K19662
Glycosphingolipid biosynthesis - globo and isoglobo series	ko00603	2	29	412	16445	BMK_Unigene_020982;BMK_Unigene_087700	K12373+K12373
DNA replication	ko03030	2	120	412	16445	BMK_Unigene_000596;BMK_Unigene_071354	K02327+K10742
Arginine biosynthesis	ko00220	4	137	412	16445	BMK_Unigene_010586;BMK_Unigene_013820;BMK_Unigene_034813;BMK_Unigene_037506	K00261+K01476+K01915+K01915
Tropane, piperidine and pyridine alkaloid biosynthesis	ko00960	3	76	412	16445	BMK_Unigene_045329;BMK_Unigene_065202;BMK_Unigene_069205	K00276+K00276+K00815
Ribosome biogenesis in eukaryotes	ko03008	4	251	412	16445	BMK_Unigene_015999;BMK_Unigene_022571;BMK_Unigene_069247;BMK_Unigene_072120	K18532+K12619+K03097+K14544
C5-Branched dibasic acid metabolism	ko00660	1	26	412	16445	BMK_Unigene_090099	K01653
Lysine biosynthesis	ko00300	2	36	412	16445	BMK_Unigene_065859;BMK_Unigene_071486	K10206+K00215
beta-Alanine metabolism	ko00410	3	172	412	16445	BMK_Unigene_045329;BMK_Unigene_065202;BMK_Unigene_084496	K00276+K00276+K00128
Inositol phosphate metabolism	ko00562	4	293	412	16445	BMK_Unigene_018526;BMK_Unigene_049978;BMK_Unigene_066227;BMK_Unigene_088146	K05857+K00469+K13711+K00889
ABC transporters	ko02010	8	267	412	16445	BMK_Unigene_006345;BMK_Unigene_018292;BMK_Unigene_018314;BMK_Unigene_019540;BMK_Unigene_021358;BMK_Unigene_024001;BMK_Unigene_049888;BMK_Unigene_071562	K05665+K05666+K05681+K05658+K08712+K05681+K05681+K08711
Glutathione metabolism	ko00480	6	256	412	16445	BMK_Unigene_022899;BMK_Unigene_024073;BMK_Unigene_024467;BMK_Unigene_083680;BMK_Unigene_084262;BMK_Unigene_092728	K00799+K00799+K00799+K00799+K11188+K00799
MAPK signaling pathway - plant	ko04016	23	540	412	16445	BMK_Unigene_007891;BMK_Unigene_017557;BMK_Unigene_017707;BMK_Unigene_018661;BMK_Unigene_019761;BMK_Unigene_021110;BMK_Unigene_023478;BMK_Unigene_024092;BMK_Unigene_024236;BMK_Unigene_034265;BMK_Unigene_037363;BMK_Unigene_037917;BMK_Unigene_039790;BMK_Unigene_040914;BMK_Unigene_042042;BMK_Unigene_045988;BMK_Unigene_048132;BMK_Unigene_048418;BMK_Unigene_049635;BMK_Unigene_062074;BMK_Unigene_064079;…	K13449+K20772+K13449+K13449+K13424+K13414+K13416+K14509+K13449+K13420+K20728+K13420+K16224+K14516+K14497+K14516+K13420+K13449+K14497+K13449+K20547+K13424+K03781
Fatty acid biosynthesis	ko00061	2	112	412	16445	BMK_Unigene_002587;BMK_Unigene_067610	K00645+K01897
Valine, leucine and isoleucine biosynthesis	ko00290	1	61	412	16445	BMK_Unigene_090099	K01653
Mismatch repair	ko03430	2	108	412	16445	BMK_Unigene_000596;BMK_Unigene_021098	K02327+K08736
Glyoxylate and dicarboxylate metabolism	ko00630	4	319	412	16445	BMK_Unigene_034813;BMK_Unigene_037506;BMK_Unigene_084481;BMK_Unigene_088372	K01915+K01915+K11517+K03781
Fructose and mannose metabolism	ko00051	1	203	412	16445	BMK_Unigene_082534	K19355
Pentose and glucuronate interconversions	ko00040	34	349	412	16445	BMK_Unigene_014007;BMK_Unigene_017283;BMK_Unigene_018956;BMK_Unigene_020889;BMK_Unigene_024375;BMK_Unigene_035651;BMK_Unigene_039756;BMK_Unigene_043378;BMK_Unigene_043487;BMK_Unigene_043920;BMK_Unigene_046229;BMK_Unigene_046915;BMK_Unigene_047559;BMK_Unigene_049358;BMK_Unigene_064042;BMK_Unigene_065736;BMK_Unigene_065818;BMK_Unigene_065913;BMK_Unigene_067316;BMK_Unigene_067317;BMK_Unigene_067948;…	K01051+K01184+K01051+K01213+K01051+K01728+K01728+K01051+K01051+K01051+K01213+K01051+K01213+K01213+K01051+K01728+K01051+K01051+K01213+K01213+K01213+K01051+K01184+K01051+K01728+K01213+K01213+K01051+K01728+K00963+K01051+K01051+K01051+K01213
Pyruvate metabolism	ko00620	11	306	412	16445	BMK_Unigene_004266;BMK_Unigene_018377;BMK_Unigene_020200;BMK_Unigene_040720;BMK_Unigene_045890;BMK_Unigene_047060;BMK_Unigene_067421;BMK_Unigene_068055;BMK_Unigene_068515;BMK_Unigene_068880;BMK_Unigene_084496	K01759+K01679+K00873+K00029+K00873+K01679+K00029+K01759+K01679+K01759+K00128
Ascorbate and aldarate metabolism	ko00053	5	222	412	16445	BMK_Unigene_016273;BMK_Unigene_021263;BMK_Unigene_037520;BMK_Unigene_049978;BMK_Unigene_084496	K00423+K00423+K00423+K00469+K00128
Protein processing in endoplasmic reticulum	ko04141	14	733	412	16445	BMK_Unigene_000417;BMK_Unigene_004917;BMK_Unigene_015249;BMK_Unigene_016345;BMK_Unigene_016348;BMK_Unigene_017741;BMK_Unigene_022271;BMK_Unigene_022878;BMK_Unigene_040387;BMK_Unigene_048683;BMK_Unigene_062952;BMK_Unigene_068755;BMK_Unigene_071756;BMK_Unigene_072692	K14009+K10575+K04374+K03283+K03283+K10839+K01456+K08653+K04374+K14003+K09561+K04374+K14009+K13993
Sphingolipid metabolism	ko00600	7	185	412	16445	BMK_Unigene_004681;BMK_Unigene_015323;BMK_Unigene_024000;BMK_Unigene_046230;BMK_Unigene_048038;BMK_Unigene_069709;BMK_Unigene_090358	K04710+K12309+K12309+K17108+K12309+K04712+K04712
2-Oxocarboxylic acid metabolism	ko01210	1	208	412	16445	BMK_Unigene_090099	K01653
Sesquiterpenoid and triterpenoid biosynthesis	ko00909	3	78	412	16445	BMK_Unigene_013446;BMK_Unigene_023346;BMK_Unigene_087906	K14173+K15803+K15803
Ubiquitin mediated proteolysis	ko04120	11	413	412	16445	BMK_Unigene_003050;BMK_Unigene_004917;BMK_Unigene_019369;BMK_Unigene_019387;BMK_Unigene_045740;BMK_Unigene_046350;BMK_Unigene_062952;BMK_Unigene_071843;BMK_Unigene_085743;BMK_Unigene_087742;BMK_Unigene_087987	K03354+K10575+K08770+K10260+K10260+K10614+K09561+K08770+K04506+K04506+K10260
RNA polymerase	ko03020	3	168	412	16445	BMK_Unigene_003083;BMK_Unigene_006817;BMK_Unigene_023876	K03006+K03006+K03006
RNA degradation	ko03018	9	396	412	16445	BMK_Unigene_000572;BMK_Unigene_002431;BMK_Unigene_004513;BMK_Unigene_013594;BMK_Unigene_015522;BMK_Unigene_017924;BMK_Unigene_022571;BMK_Unigene_036628;BMK_Unigene_067351	K12600+K13126+K12606+K13126+K04077+K04077+K12619+K12581+K12606
Glycosaminoglycan degradation	ko00531	6	106	412	16445	BMK_Unigene_015323;BMK_Unigene_020982;BMK_Unigene_024000;BMK_Unigene_048038;BMK_Unigene_070295;BMK_Unigene_087700	K12309+K12373+K12309+K12309+K10532+K12373
Carotenoid biosynthesis	ko00906	1	110	412	16445	BMK_Unigene_092659	K09841
RNA transport	ko03013	6	494	412	16445	BMK_Unigene_002431;BMK_Unigene_013594;BMK_Unigene_019033;BMK_Unigene_039983;BMK_Unigene_061318;BMK_Unigene_065906	K13126+K13126+K00974+K14313+K03113+K14297
Various types of N-glycan biosynthesis	ko00513	2	90	412	16445	BMK_Unigene_020982;BMK_Unigene_087700	K12373+K12373
Ribosome	ko03010	3	786	412	16445	BMK_Unigene_035062;BMK_Unigene_063941;BMK_Unigene_093372	K02986+K02875+K02942
Aminoacyl-tRNA biosynthesis	ko00970	3	186	412	16445	BMK_Unigene_018211;BMK_Unigene_083068;BMK_Unigene_087575	K02433+K02433+K02433
Phosphonate and phosphinate metabolism	ko00440	1	22	412	16445	BMK_Unigene_019216	K00993
Ether lipid metabolism	ko00565	8	98	412	16445	BMK_Unigene_016106;BMK_Unigene_016107;BMK_Unigene_019216;BMK_Unigene_041530;BMK_Unigene_049010;BMK_Unigene_070342;BMK_Unigene_071130;BMK_Unigene_086852	K01115+K01115+K00993+K01047+K01115+K01115+K01115+K14674
Monoterpenoid biosynthesis	ko00902	5	49	412	16445	BMK_Unigene_008419;BMK_Unigene_018262;BMK_Unigene_021222;BMK_Unigene_071960;BMK_Unigene_089783	K23232+K23810+K23810+K21926+K23810
Plant-pathogen interaction	ko04626	52	950	412	16445	BMK_Unigene_004404;BMK_Unigene_007891;BMK_Unigene_011064;BMK_Unigene_017331;BMK_Unigene_017707;BMK_Unigene_018440;BMK_Unigene_018661;BMK_Unigene_018675;BMK_Unigene_019025;BMK_Unigene_019761;BMK_Unigene_020121;BMK_Unigene_020503;BMK_Unigene_020665;BMK_Unigene_021110;BMK_Unigene_021941;BMK_Unigene_022425;BMK_Unigene_023394;BMK_Unigene_023478;BMK_Unigene_024236;BMK_Unigene_034265;BMK_Unigene_037917;…	K13412+K13449+K13448+K18834+K13449+K13430+K13449+K13436+K12795+K13424+K13430+K13430+K15397+K13414+K13435+K13430+K13457+K13416+K13449+K13420+K13420+K16224+K13412+K15397+K05391+K13435+K13436+K13435+K13448+K13420+K13449+K13457+K13457+K13449+K13430+K13436+K13435+K13430+K13430+K13435+K13435+K13459+K13457+K13428+K13412+K13456+K13448+K13424+K13457+K13457+K13430+K13430
Biosynthesis of amino acids	ko01230	10	779	412	16445	BMK_Unigene_001298;BMK_Unigene_013820;BMK_Unigene_020200;BMK_Unigene_034813;BMK_Unigene_037506;BMK_Unigene_045890;BMK_Unigene_065859;BMK_Unigene_071486;BMK_Unigene_090099;BMK_Unigene_090896	K22846+K01476+K00873+K01915+K01915+K00873+K10206+K00215+K01653+K01953
Isoquinoline alkaloid biosynthesis	ko00950	3	63	412	16445	BMK_Unigene_045329;BMK_Unigene_065202;BMK_Unigene_069205	K00276+K00276+K00815
Glycosphingolipid biosynthesis - ganglio series	ko00604	5	84	412	16445	BMK_Unigene_015323;BMK_Unigene_020982;BMK_Unigene_024000;BMK_Unigene_048038;BMK_Unigene_087700	K12309+K12373+K12309+K12309+K12373
Mitophagy - animal	ko04137	1	26	412	16445	BMK_Unigene_019369	K08770

## Sheet: T-P3_T-P1_T-P2_vs_T-T2_T-T3_T-T
Table S3: Genes in specific KEGG pathways among stigmas of different P. auriculata pollination.
#KEGG_n	1236	KEGG_N	16445
#Pathway	ko_ID	DEgene	gene	DEgene_all	gene_all	Gene_id	KOs
Vancomycin resistance	ko01502	1	4	1236	16445	BMK_Unigene_091316	K01921
Lysosome	ko04142	4	87	1236	16445	BMK_Unigene_084767;BMK_Unigene_089878;BMK_Unigene_091140;BMK_Unigene_092010	K01363+K01379+K05656+K01365
Ubiquinone and other terpenoid-quinone biosynthesis	ko00130	14	113	1236	16445	BMK_Unigene_020886;BMK_Unigene_022418;BMK_Unigene_022451;BMK_Unigene_036267;BMK_Unigene_044457;BMK_Unigene_046815;BMK_Unigene_048567;BMK_Unigene_063457;BMK_Unigene_064052;BMK_Unigene_070223;BMK_Unigene_072415;BMK_Unigene_086436;BMK_Unigene_087807;BMK_Unigene_092886	K00815+K23094+K05928+K12501+K09834+K12501+K00815+K00457+K06127+K05928+K01904+K09834+K09833+K03809
Histidine metabolism	ko00340	6	82	1236	16445	BMK_Unigene_022630;BMK_Unigene_023903;BMK_Unigene_041995;BMK_Unigene_063487;BMK_Unigene_084267;BMK_Unigene_084496	K01590+K00128+K00128+K00128+K14152+K00128
RNA degradation	ko03018	22	396	1236	16445	BMK_Unigene_000430;BMK_Unigene_000572;BMK_Unigene_005287;BMK_Unigene_006364;BMK_Unigene_007297;BMK_Unigene_008362;BMK_Unigene_013199;BMK_Unigene_015522;BMK_Unigene_016671;BMK_Unigene_017924;BMK_Unigene_020287;BMK_Unigene_022225;BMK_Unigene_036783;BMK_Unigene_041830;BMK_Unigene_044579;BMK_Unigene_049067;BMK_Unigene_067973;BMK_Unigene_070958;BMK_Unigene_085507;BMK_Unigene_086113;BMK_Unigene_086604;…	K04077+K12600+K01148+K00850+K12606+K00850+K14442+K04077+K10643+K04077+K14442+K03678+K12581+K01148+K12606+K04077+K14442+K03514+K12614+K12605+K13126+K12581
Fatty acid metabolism	ko01212	10	242	1236	16445	BMK_Unigene_004866;BMK_Unigene_020782;BMK_Unigene_064814;BMK_Unigene_066959;BMK_Unigene_071119;BMK_Unigene_081266;BMK_Unigene_088098;BMK_Unigene_088234;BMK_Unigene_089027;BMK_Unigene_090221	K10246+K01897+K01897+K10527+K01897+K00232+K10256+K10246+K01897+K03921
Valine, leucine and isoleucine degradation	ko00280	18	207	1236	16445	BMK_Unigene_005625;BMK_Unigene_007128;BMK_Unigene_009649;BMK_Unigene_016281;BMK_Unigene_023899;BMK_Unigene_023903;BMK_Unigene_040552;BMK_Unigene_041995;BMK_Unigene_063487;BMK_Unigene_068570;BMK_Unigene_081211;BMK_Unigene_084496;BMK_Unigene_086810;BMK_Unigene_087701;BMK_Unigene_091075;BMK_Unigene_092400;BMK_Unigene_092601;BMK_Unigene_092716	K01640+K00140+K01640+K00166+K00140+K00128+K00020+K00128+K00128+K00020+K01968+K00128+K00020+K01968+K23146+K01968+K00140+K00140
Chlorocyclohexane and chlorobenzene degradation	ko00361	2	7	1236	16445	BMK_Unigene_009205;BMK_Unigene_013589	K01061+K01061
Starch and sucrose metabolism	ko00500	63	586	1236	16445	BMK_Unigene_002321;BMK_Unigene_002543;BMK_Unigene_003266;BMK_Unigene_003622;BMK_Unigene_005367;BMK_Unigene_007102;BMK_Unigene_008487;BMK_Unigene_010828;BMK_Unigene_012199;BMK_Unigene_013055;BMK_Unigene_017765;BMK_Unigene_019439;BMK_Unigene_019673;BMK_Unigene_019904;BMK_Unigene_020499;BMK_Unigene_021796;BMK_Unigene_022061;BMK_Unigene_022264;BMK_Unigene_022622;BMK_Unigene_023934;BMK_Unigene_035318;…	K19891+K19893+K01200+K01176+K00703+K01087+K19891+K01179+K00975+K00688+K19893+K00703+K07024+K01176+K01810+K01179+K00975+K01087+K00975+K19891+K01087+K00975+K19892+K19893+K05350+K01176+K01214+K01176+K16055+K19891+K19891+K00963+K01087+K19893+K01188+K05349+K19891+K00963+K00705+K01188+K00975+K19891+K00700+K16055+K01193+K00705+K01087+K00700+K01188+K19891+K19891+K00963+K01179+K01087+K01188+K19891+K01179+…
RNA transport	ko03013	25	494	1236	16445	BMK_Unigene_000575;BMK_Unigene_004543;BMK_Unigene_014474;BMK_Unigene_016092;BMK_Unigene_020746;BMK_Unigene_022059;BMK_Unigene_023728;BMK_Unigene_041205;BMK_Unigene_043453;BMK_Unigene_045266;BMK_Unigene_048838;BMK_Unigene_049330;BMK_Unigene_049813;BMK_Unigene_059613;BMK_Unigene_062007;BMK_Unigene_064441;BMK_Unigene_071535;BMK_Unigene_072317;BMK_Unigene_085804;BMK_Unigene_086150;BMK_Unigene_086152;…	K18213+K01164+K12880+K03254+K14317+K00784+K14309+K09291+K14308+K14294+K14300+K14288+K03231+K14314+K03241+K14313+K14314+K03260+K03231+K03231+K03231+K13126+K03257+K14320+K03239
Valine, leucine and isoleucine biosynthesis	ko00290	4	61	1236	16445	BMK_Unigene_046255;BMK_Unigene_067976;BMK_Unigene_081684;BMK_Unigene_090099	K01754+K01754+K01653+K01653
Mannose type O-glycan biosynthesis	ko00515	1	8	1236	16445	BMK_Unigene_046707	K18207
Homologous recombination	ko03440	18	197	1236	16445	BMK_Unigene_009454;BMK_Unigene_010275;BMK_Unigene_010769;BMK_Unigene_010800;BMK_Unigene_020568;BMK_Unigene_022933;BMK_Unigene_023154;BMK_Unigene_035475;BMK_Unigene_045206;BMK_Unigene_045655;BMK_Unigene_046118;BMK_Unigene_066062;BMK_Unigene_071877;BMK_Unigene_072381;BMK_Unigene_082965;BMK_Unigene_088553;BMK_Unigene_090902;BMK_Unigene_092726	K10875+K10875+K12173+K03165+K10739+K12173+K10683+K10875+K12173+K10865+K10870+K07466+K10879+K03505+K12173+K10866+K03553+K07466
Pyrimidine metabolism	ko00240	15	180	1236	16445	BMK_Unigene_014442;BMK_Unigene_017905;BMK_Unigene_020438;BMK_Unigene_020659;BMK_Unigene_023667;BMK_Unigene_025216;BMK_Unigene_045811;BMK_Unigene_048323;BMK_Unigene_048448;BMK_Unigene_065093;BMK_Unigene_069055;BMK_Unigene_071968;BMK_Unigene_082099;BMK_Unigene_082787;BMK_Unigene_092115	K13421+K01937+K01937+K01465+K00761+K00857+K01937+K03787+K00761+K01081+K16904+K00761+K10808+K00943+K13998
Nicotinate and nicotinamide metabolism	ko00760	7	100	1236	16445	BMK_Unigene_001867;BMK_Unigene_046271;BMK_Unigene_048049;BMK_Unigene_048323;BMK_Unigene_065093;BMK_Unigene_068418;BMK_Unigene_091754	K03517+K11414+K20170+K03787+K01081+K11416+K20170
Glycosaminoglycan degradation	ko00531	7	106	1236	16445	BMK_Unigene_043424;BMK_Unigene_047425;BMK_Unigene_064895;BMK_Unigene_065252;BMK_Unigene_068025;BMK_Unigene_085384;BMK_Unigene_087639	K12373+K10532+K12309+K12309+K12309+K12309+K12309
Mitophagy - yeast	ko04139	1	3	1236	16445	BMK_Unigene_068384	K17065
Propanoate metabolism	ko00640	7	162	1236	16445	BMK_Unigene_007128;BMK_Unigene_016281;BMK_Unigene_023899;BMK_Unigene_081266;BMK_Unigene_091075;BMK_Unigene_092601;BMK_Unigene_092716	K00140+K00166+K00140+K00232+K23146+K00140+K00140
Anthocyanin biosynthesis	ko00942	2	7	1236	16445	BMK_Unigene_006175;BMK_Unigene_091398	K12930+K12930
Glutathione metabolism	ko00480	21	256	1236	16445	BMK_Unigene_000345;BMK_Unigene_007401;BMK_Unigene_009193;BMK_Unigene_013251;BMK_Unigene_015717;BMK_Unigene_020627;BMK_Unigene_022700;BMK_Unigene_024073;BMK_Unigene_035256;BMK_Unigene_039082;BMK_Unigene_039996;BMK_Unigene_043314;BMK_Unigene_044715;BMK_Unigene_059551;BMK_Unigene_063678;BMK_Unigene_067056;BMK_Unigene_072225;BMK_Unigene_076242;BMK_Unigene_082099;BMK_Unigene_090806;BMK_Unigene_093094	K01255+K00799+K00799+K00799+K00799+K00799+K00797+K00799+K00434+K00036+K22596+K00799+K15428+K00799+K00799+K21888+K18592+K00434+K10808+K00799+K00797
Lipopolysaccharide biosynthesis	ko00540	1	3	1236	16445	BMK_Unigene_021962	K02536
Glycosphingolipid biosynthesis - globo and isoglobo series	ko00603	3	29	1236	16445	BMK_Unigene_024163;BMK_Unigene_043424;BMK_Unigene_086537	K07407+K12373+K07407
DNA replication	ko03030	5	120	1236	16445	BMK_Unigene_020568;BMK_Unigene_066062;BMK_Unigene_072381;BMK_Unigene_091020;BMK_Unigene_092726	K10739+K07466+K03505+K02209+K07466
Phosphatidylinositol signaling system	ko04070	22	262	1236	16445	BMK_Unigene_001753;BMK_Unigene_004644;BMK_Unigene_007302;BMK_Unigene_008578;BMK_Unigene_015684;BMK_Unigene_017594;BMK_Unigene_018526;BMK_Unigene_022139;BMK_Unigene_024005;BMK_Unigene_045745;BMK_Unigene_045945;BMK_Unigene_046866;BMK_Unigene_049418;BMK_Unigene_063267;BMK_Unigene_070501;BMK_Unigene_085763;BMK_Unigene_086170;BMK_Unigene_087121;BMK_Unigene_088017;BMK_Unigene_089301;BMK_Unigene_091272;…	K00889+K01110+K10572+K10047+K18082+K00889+K05857+K13024+K02183+K18082+K02677+K01099+K13024+K00901+K00901+K00901+K18082+K18081+K00901+K02677+K10572+K13024
Alcoholism	ko05034	1	7	1236	16445	BMK_Unigene_014093	K11252
SNARE interactions in vesicular transport	ko04130	5	83	1236	16445	BMK_Unigene_015328;BMK_Unigene_045599;BMK_Unigene_072527;BMK_Unigene_081617;BMK_Unigene_082118	K08486+K08490+K08486+K08486+K08486
Focal adhesion	ko04510	1	39	1236	16445	BMK_Unigene_092981	K04725
Mismatch repair	ko03430	10	108	1236	16445	BMK_Unigene_003995;BMK_Unigene_005539;BMK_Unigene_018780;BMK_Unigene_020568;BMK_Unigene_047365;BMK_Unigene_066062;BMK_Unigene_071832;BMK_Unigene_072381;BMK_Unigene_092442;BMK_Unigene_092726	K07456+K08736+K07456+K10739+K07456+K07466+K03555+K03505+K08739+K07466
Fatty acid biosynthesis	ko00061	5	112	1236	16445	BMK_Unigene_020782;BMK_Unigene_064814;BMK_Unigene_071119;BMK_Unigene_089027;BMK_Unigene_090221	K01897+K01897+K01897+K01897+K03921
Phosphonate and phosphinate metabolism	ko00440	1	22	1236	16445	BMK_Unigene_016469	K00967
Isoquinoline alkaloid biosynthesis	ko00950	3	63	1236	16445	BMK_Unigene_020886;BMK_Unigene_048567;BMK_Unigene_066043	K00815+K00815+K14454
Base excision repair	ko03410	8	120	1236	16445	BMK_Unigene_008537;BMK_Unigene_015964;BMK_Unigene_018727;BMK_Unigene_044114;BMK_Unigene_046289;BMK_Unigene_063681;BMK_Unigene_072381;BMK_Unigene_086778	K01246+K10802+K10773+K01246+K10771+K01246+K03505+K10773
Other types of O-glycan biosynthesis	ko00514	6	67	1236	16445	BMK_Unigene_000469;BMK_Unigene_048329;BMK_Unigene_060574;BMK_Unigene_062863;BMK_Unigene_071555;BMK_Unigene_087993	K03691+K20782+K13667+K13667+K13667+K20783
Zeatin biosynthesis	ko00908	8	65	1236	16445	BMK_Unigene_004510;BMK_Unigene_005219;BMK_Unigene_018984;BMK_Unigene_042134;BMK_Unigene_045969;BMK_Unigene_047130;BMK_Unigene_047827;BMK_Unigene_066787	K23452+K13496+K00279+K00279+K23452+K13496+K00279+K00279
Synthesis and degradation of ketone bodies	ko00072	2	20	1236	16445	BMK_Unigene_005625;BMK_Unigene_009649	K01640+K01640
Cutin, suberine and wax biosynthesis	ko00073	14	114	1236	16445	BMK_Unigene_012810;BMK_Unigene_016449;BMK_Unigene_037492;BMK_Unigene_047021;BMK_Unigene_048626;BMK_Unigene_048999;BMK_Unigene_059577;BMK_Unigene_060511;BMK_Unigene_068235;BMK_Unigene_085903;BMK_Unigene_088431;BMK_Unigene_089601;BMK_Unigene_089602;BMK_Unigene_091521	K15401+K17991+K15405+K15398+K15405+K15406+K13356+K17991+K20495+K15402+K15406+K15405+K15405+K15405
Arginine biosynthesis	ko00220	14	137	1236	16445	BMK_Unigene_010586;BMK_Unigene_016323;BMK_Unigene_017272;BMK_Unigene_018084;BMK_Unigene_034813;BMK_Unigene_037506;BMK_Unigene_041840;BMK_Unigene_042706;BMK_Unigene_044187;BMK_Unigene_046934;BMK_Unigene_066043;BMK_Unigene_084710;BMK_Unigene_089854;BMK_Unigene_090391	K00261+K00261+K00262+K14677+K01915+K01915+K14682+K00261+K01915+K01915+K14454+K01915+K01915+K00261
Limonene and pinene degradation	ko00903	4	31	1236	16445	BMK_Unigene_023903;BMK_Unigene_041995;BMK_Unigene_063487;BMK_Unigene_084496	K00128+K00128+K00128+K00128
Autophagy - animal	ko04140	7	37	1236	16445	BMK_Unigene_015684;BMK_Unigene_021369;BMK_Unigene_045745;BMK_Unigene_084767;BMK_Unigene_086170;BMK_Unigene_089878;BMK_Unigene_092010	K18082+K19330+K18082+K01363+K18082+K01379+K01365
Peroxisome	ko04146	15	315	1236	16445	BMK_Unigene_005625;BMK_Unigene_009649;BMK_Unigene_020782;BMK_Unigene_044844;BMK_Unigene_047966;BMK_Unigene_048908;BMK_Unigene_059577;BMK_Unigene_062476;BMK_Unigene_062847;BMK_Unigene_064814;BMK_Unigene_071119;BMK_Unigene_072262;BMK_Unigene_081266;BMK_Unigene_081354;BMK_Unigene_089027	K01640+K01640+K01897+K04565+K11517+K13339+K13356+K08726+K13336+K01897+K01897+K08726+K00232+K04565+K01897
ABC transporters	ko02010	26	267	1236	16445	BMK_Unigene_015638;BMK_Unigene_015821;BMK_Unigene_018292;BMK_Unigene_022018;BMK_Unigene_022411;BMK_Unigene_023192;BMK_Unigene_043525;BMK_Unigene_045127;BMK_Unigene_045488;BMK_Unigene_045841;BMK_Unigene_046819;BMK_Unigene_047836;BMK_Unigene_048051;BMK_Unigene_048500;BMK_Unigene_048544;BMK_Unigene_048693;BMK_Unigene_049888;BMK_Unigene_065504;BMK_Unigene_065694;BMK_Unigene_068320;BMK_Unigene_068765;…	K05648+K08712+K05666+K05681+K08712+K05658+K05665+K02193+K05681+K05666+K02471+K05681+K08711+K08711+K05666+K05658+K05681+K05648+K05666+K05681+K02193+K05666+K08711+K05679+K10440+K05656
Carbon fixation in photosynthetic organisms	ko00710	17	235	1236	16445	BMK_Unigene_002550;BMK_Unigene_010577;BMK_Unigene_011453;BMK_Unigene_013360;BMK_Unigene_018499;BMK_Unigene_040719;BMK_Unigene_044184;BMK_Unigene_045755;BMK_Unigene_049750;BMK_Unigene_066043;BMK_Unigene_069731;BMK_Unigene_072657;BMK_Unigene_085356;BMK_Unigene_089323;BMK_Unigene_090521;BMK_Unigene_091613;BMK_Unigene_101271	K01601+K00855+K03841+K01595+K00029+K00029+K03841+K01803+K01623+K14454+K03841+K00025+K01803+K00029+K00927+K03841+K03841
Wnt signaling pathway	ko04310	2	23	1236	16445	BMK_Unigene_045945;BMK_Unigene_089301	K02677+K02677
Isoflavonoid biosynthesis	ko00943	4	31	1236	16445	BMK_Unigene_000049;BMK_Unigene_047796;BMK_Unigene_065470;BMK_Unigene_090890	K13260+K13260+K13260+K13260
Mitophagy - animal	ko04137	2	26	1236	16445	BMK_Unigene_019369;BMK_Unigene_023303	K08770+K20168
Phenylpropanoid biosynthesis	ko00940	40	352	1236	16445	BMK_Unigene_000565;BMK_Unigene_002331;BMK_Unigene_002506;BMK_Unigene_005574;BMK_Unigene_015945;BMK_Unigene_016299;BMK_Unigene_020124;BMK_Unigene_021849;BMK_Unigene_023317;BMK_Unigene_039994;BMK_Unigene_041039;BMK_Unigene_042336;BMK_Unigene_045914;BMK_Unigene_046140;BMK_Unigene_046789;BMK_Unigene_046988;BMK_Unigene_048502;BMK_Unigene_048724;BMK_Unigene_049345;BMK_Unigene_068205;BMK_Unigene_070064;…	K23260+K00430+K00430+K00430+K00430+K00430+K22395+K00430+K12355+K05350+K00430+K13065+K00430+K18368+K01188+K05349+K18368+K01188+K22395+K22395+K01188+K12355+K23260+K01904+K00430+K23260+K13066+K00430+K01188+K00083+K22395+K01188+K23260+K13065+K00430+K12355+K13066+K22395+K00430+K00430
Ubiquitin mediated proteolysis	ko04120	29	413	1236	16445	BMK_Unigene_008378;BMK_Unigene_015556;BMK_Unigene_015807;BMK_Unigene_018906;BMK_Unigene_019369;BMK_Unigene_019387;BMK_Unigene_020411;BMK_Unigene_020814;BMK_Unigene_023009;BMK_Unigene_024304;BMK_Unigene_039667;BMK_Unigene_042238;BMK_Unigene_043489;BMK_Unigene_045740;BMK_Unigene_046350;BMK_Unigene_047114;BMK_Unigene_048338;BMK_Unigene_048495;BMK_Unigene_063531;BMK_Unigene_066426;BMK_Unigene_070168;…	K06689+K03875+K04706+K10581+K08770+K10260+K10595+K06688+K03354+K10260+K10260+K06689+K06689+K10260+K10614+K10144+K10260+K03348+K10573+K10614+K10570+K06689+K10260+K10260+K10576+K04506+K10614+K10575+K04725
Brassinosteroid biosynthesis	ko00905	4	26	1236	16445	BMK_Unigene_012522;BMK_Unigene_039453;BMK_Unigene_044933;BMK_Unigene_076954	K09590+K09590+K20623+K09590
Phototransduction - fly	ko04745	1	12	1236	16445	BMK_Unigene_091320	K05692
Glyoxylate and dicarboxylate metabolism	ko00630	22	319	1236	16445	BMK_Unigene_002550;BMK_Unigene_012439;BMK_Unigene_024019;BMK_Unigene_034813;BMK_Unigene_037506;BMK_Unigene_043438;BMK_Unigene_043571;BMK_Unigene_043705;BMK_Unigene_044187;BMK_Unigene_044742;BMK_Unigene_046934;BMK_Unigene_047079;BMK_Unigene_047966;BMK_Unigene_049165;BMK_Unigene_066147;BMK_Unigene_072031;BMK_Unigene_072657;BMK_Unigene_084710;BMK_Unigene_086373;BMK_Unigene_086929;BMK_Unigene_087746;…	K01601+K00600+K22133+K01915+K01915+K19269+K00018+K00605+K01915+K18121+K01915+K19269+K11517+K00600+K19269+K22133+K00025+K01915+K00015+K01433+K15918+K01915
Glucosinolate biosynthesis	ko00966	2	21	1236	16445	BMK_Unigene_071031;BMK_Unigene_092539	K11820+K12153
Naphthalene degradation	ko00626	1	8	1236	16445	BMK_Unigene_086493	K00121
Lysine biosynthesis	ko00300	3	36	1236	16445	BMK_Unigene_042818;BMK_Unigene_048653;BMK_Unigene_065859	K10206+K00215+K10206
Flavone and flavonol biosynthesis	ko00944	3	17	1236	16445	BMK_Unigene_018864;BMK_Unigene_023991;BMK_Unigene_047531	K22772+K13083+K05280
Systemic lupus erythematosus	ko05322	1	17	1236	16445	BMK_Unigene_014093	K11252
Non-homologous end-joining	ko03450	2	23	1236	16445	BMK_Unigene_045655;BMK_Unigene_088553	K10865+K10866
Various types of N-glycan biosynthesis	ko00513	8	90	1236	16445	BMK_Unigene_021052;BMK_Unigene_035212;BMK_Unigene_043424;BMK_Unigene_049614;BMK_Unigene_065801;BMK_Unigene_065807;BMK_Unigene_066407;BMK_Unigene_092802	K23741+K12666+K12373+K12666+K14412+K03846+K07151+K12666
Porphyrin and chlorophyll metabolism	ko00860	5	157	1236	16445	BMK_Unigene_036561;BMK_Unigene_039523;BMK_Unigene_043792;BMK_Unigene_045646;BMK_Unigene_070801	K13544+K01845+K13544+K13600+K02259
Circadian rhythm - plant	ko04712	21	180	1236	16445	BMK_Unigene_000655;BMK_Unigene_003939;BMK_Unigene_007936;BMK_Unigene_011518;BMK_Unigene_012688;BMK_Unigene_015956;BMK_Unigene_016002;BMK_Unigene_019377;BMK_Unigene_040097;BMK_Unigene_045676;BMK_Unigene_048508;BMK_Unigene_066320;BMK_Unigene_069247;BMK_Unigene_069658;BMK_Unigene_070318;BMK_Unigene_084847;BMK_Unigene_085750;BMK_Unigene_089085;BMK_Unigene_089398;BMK_Unigene_091289;BMK_Unigene_093540	K16221+K12126+K12133+K12135+K12135+K16223+K12121+K12125+K00660+K12125+K12133+K16223+K03097+K12133+K00660+K12126+K12125+K16241+K12133+K12126+K16223
Purine metabolism	ko00230	21	356	1236	16445	BMK_Unigene_016498;BMK_Unigene_018415;BMK_Unigene_019362;BMK_Unigene_021910;BMK_Unigene_022853;BMK_Unigene_040495;BMK_Unigene_040961;BMK_Unigene_044282;BMK_Unigene_045759;BMK_Unigene_047001;BMK_Unigene_047993;BMK_Unigene_048323;BMK_Unigene_048734;BMK_Unigene_048738;BMK_Unigene_065093;BMK_Unigene_068338;BMK_Unigene_082099;BMK_Unigene_082939;BMK_Unigene_090509;BMK_Unigene_091955;BMK_Unigene_092696	K01756+K00856+K00759+K01517+K01768+K00951+K18532+K00759+K13811+K00951+K01466+K03787+K01923+K00602+K01081+K13811+K10808+K06928+K01488+K00602+K18532
Two-component system	ko02020	3	32	1236	16445	BMK_Unigene_017789;BMK_Unigene_069973;BMK_Unigene_069974	K00990+K00990+K00990
beta-Alanine metabolism	ko00410	11	172	1236	16445	BMK_Unigene_007128;BMK_Unigene_023899;BMK_Unigene_023903;BMK_Unigene_041995;BMK_Unigene_063487;BMK_Unigene_063578;BMK_Unigene_081266;BMK_Unigene_084496;BMK_Unigene_091075;BMK_Unigene_092601;BMK_Unigene_092716	K00140+K00140+K00128+K00128+K00128+K01580+K00232+K00128+K23146+K00140+K00140
Sulfur metabolism	ko00920	3	70	1236	16445	BMK_Unigene_006064;BMK_Unigene_045759;BMK_Unigene_068338	K01738+K13811+K13811
Chloroalkane and chloroalkene degradation	ko00625	1	5	1236	16445	BMK_Unigene_086493	K00121
N-Glycan biosynthesis	ko00510	8	112	1236	16445	BMK_Unigene_021052;BMK_Unigene_035212;BMK_Unigene_042769;BMK_Unigene_044237;BMK_Unigene_049614;BMK_Unigene_065807;BMK_Unigene_066407;BMK_Unigene_092802	K23741+K12666+K00729+K00737+K12666+K03846+K07151+K12666
Toluene degradation	ko00623	2	5	1236	16445	BMK_Unigene_009205;BMK_Unigene_013589	K01061+K01061
Terpenoid backbone biosynthesis	ko00900	5	146	1236	16445	BMK_Unigene_011537;BMK_Unigene_013539;BMK_Unigene_018827;BMK_Unigene_044677;BMK_Unigene_089137	K13789+K00787+K05906+K15889+K15891
Aminoacyl-tRNA biosynthesis	ko00970	6	186	1236	16445	BMK_Unigene_013188;BMK_Unigene_024060;BMK_Unigene_045299;BMK_Unigene_063388;BMK_Unigene_065632;BMK_Unigene_092727	K01875+K01870+K01883+K01886+K04567+K14227
Spliceosome	ko03040	30	605	1236	16445	BMK_Unigene_010194;BMK_Unigene_014474;BMK_Unigene_015550;BMK_Unigene_016191;BMK_Unigene_017586;BMK_Unigene_018472;BMK_Unigene_018528;BMK_Unigene_022217;BMK_Unigene_045257;BMK_Unigene_045289;BMK_Unigene_046879;BMK_Unigene_046902;BMK_Unigene_048036;BMK_Unigene_048524;BMK_Unigene_064197;BMK_Unigene_066841;BMK_Unigene_067588;BMK_Unigene_068293;BMK_Unigene_068301;BMK_Unigene_069514;BMK_Unigene_070071;…	K03283+K12880+K12900+K12848+K12818+K12865+K12741+K12741+K12835+K12842+K12897+K03283+K03283+K03283+K12837+K12823+K03283+K12834+K12896+K03283+K12852+K03283+K03283+K12829+K03283+K12821+K03283+K03283+K03283+K12832
Monoterpenoid biosynthesis	ko00902	4	49	1236	16445	BMK_Unigene_008419;BMK_Unigene_071960;BMK_Unigene_086736;BMK_Unigene_091669	K23232+K21926+K23810+K23810
Carbon metabolism	ko01200	49	955	1236	16445	BMK_Unigene_002550;BMK_Unigene_006064;BMK_Unigene_006364;BMK_Unigene_007128;BMK_Unigene_008362;BMK_Unigene_010577;BMK_Unigene_010586;BMK_Unigene_011453;BMK_Unigene_012439;BMK_Unigene_013360;BMK_Unigene_015702;BMK_Unigene_016323;BMK_Unigene_018499;BMK_Unigene_020499;BMK_Unigene_020984;BMK_Unigene_022001;BMK_Unigene_023899;BMK_Unigene_039082;BMK_Unigene_040719;BMK_Unigene_042706;BMK_Unigene_043438;…	K01601+K01738+K00850+K00140+K00850+K00855+K00261+K03841+K00600+K01595+K00162+K00261+K00029+K01810+K00627+K01834+K00140+K00036+K00029+K00261+K19269+K00018+K00605+K03841+K18121+K01803+K01754+K19269+K11517+K00600+K01623+K14454+K19269+K01754+K00627+K03841+K00025+K00232+K01803+K00121+K15918+K00029+K00261+K00927+K23146+K03841+K00140+K00140+K03841
Calcium signaling pathway	ko04020	1	33	1236	16445	BMK_Unigene_091446	K05853
Biosynthesis of unsaturated fatty acids	ko01040	6	97	1236	16445	BMK_Unigene_004866;BMK_Unigene_022897;BMK_Unigene_081266;BMK_Unigene_088098;BMK_Unigene_088234;BMK_Unigene_090221	K10246+K01068+K00232+K10256+K10246+K03921
Bacterial secretion system	ko03070	1	5	1236	16445	BMK_Unigene_067005	K11907
Carbohydrate digestion and absorption	ko04973	1	7	1236	16445	BMK_Unigene_090340	K01229
mRNA surveillance pathway	ko03015	13	325	1236	16445	BMK_Unigene_000370;BMK_Unigene_000915;BMK_Unigene_024310;BMK_Unigene_045266;BMK_Unigene_048388;BMK_Unigene_048874;BMK_Unigene_066743;BMK_Unigene_067192;BMK_Unigene_068450;BMK_Unigene_070702;BMK_Unigene_071544;BMK_Unigene_086604;BMK_Unigene_090261	K06269+K11584+K11584+K14294+K14376+K14400+K13917+K14376+K14404+K06965+K13917+K13126+K14399
Linoleic acid metabolism	ko00591	7	51	1236	16445	BMK_Unigene_010155;BMK_Unigene_018491;BMK_Unigene_035730;BMK_Unigene_035786;BMK_Unigene_046094;BMK_Unigene_068144;BMK_Unigene_071804	K00454+K00454+K15718+K00454+K15718+K00454+K15718
Betalain biosynthesis	ko00965	3	36	1236	16445	BMK_Unigene_009227;BMK_Unigene_045950;BMK_Unigene_088046	K15777+K15777+K15777
Selenocompound metabolism	ko00450	5	56	1236	16445	BMK_Unigene_045759;BMK_Unigene_048839;BMK_Unigene_066512;BMK_Unigene_068338;BMK_Unigene_091019	K13811+K00384+K11717+K13811+K01761
Thiamine metabolism	ko00730	1	68	1236	16445	BMK_Unigene_082939	K06928
Ether lipid metabolism	ko00565	8	98	1236	16445	BMK_Unigene_011112;BMK_Unigene_011502;BMK_Unigene_022488;BMK_Unigene_049010;BMK_Unigene_062382;BMK_Unigene_062448;BMK_Unigene_088610;BMK_Unigene_089163	K01115+K01114+K13510+K01115+K01115+K01062+K13519+K01115
Sphingolipid metabolism	ko00600	18	185	1236	16445	BMK_Unigene_019431;BMK_Unigene_019932;BMK_Unigene_022614;BMK_Unigene_024163;BMK_Unigene_035741;BMK_Unigene_046543;BMK_Unigene_064895;BMK_Unigene_065252;BMK_Unigene_068025;BMK_Unigene_068518;BMK_Unigene_069304;BMK_Unigene_082611;BMK_Unigene_084015;BMK_Unigene_085384;BMK_Unigene_086537;BMK_Unigene_087495;BMK_Unigene_087639;BMK_Unigene_090358	K04715+K07407+K00654+K07407+K04710+K23451+K12309+K12309+K12309+K07407+K04718+K00654+K23727+K12309+K07407+K12382+K12309+K04712
Lysine degradation	ko00310	9	153	1236	16445	BMK_Unigene_020027;BMK_Unigene_020099;BMK_Unigene_020652;BMK_Unigene_021104;BMK_Unigene_023903;BMK_Unigene_041995;BMK_Unigene_044936;BMK_Unigene_063487;BMK_Unigene_084496	K11426+K11420+K11426+K11430+K00128+K00128+K11420+K00128+K00128
Tryptophan metabolism	ko00380	10	154	1236	16445	BMK_Unigene_008981;BMK_Unigene_018876;BMK_Unigene_019636;BMK_Unigene_019637;BMK_Unigene_023903;BMK_Unigene_036916;BMK_Unigene_041995;BMK_Unigene_063487;BMK_Unigene_071031;BMK_Unigene_084496	K00837+K00837+K11816+K11816+K00128+K00837+K00128+K00128+K11820+K00128
Arachidonic acid metabolism	ko00590	6	69	1236	16445	BMK_Unigene_040099;BMK_Unigene_062476;BMK_Unigene_072113;BMK_Unigene_072225;BMK_Unigene_072262;BMK_Unigene_087331	K00079+K08726+K07425+K18592+K08726+K05309
Biosynthesis of amino acids	ko01230	41	779	1236	16445	BMK_Unigene_001298;BMK_Unigene_004871;BMK_Unigene_006064;BMK_Unigene_006364;BMK_Unigene_008362;BMK_Unigene_008448;BMK_Unigene_012439;BMK_Unigene_013685;BMK_Unigene_018084;BMK_Unigene_022001;BMK_Unigene_023419;BMK_Unigene_034813;BMK_Unigene_037506;BMK_Unigene_041840;BMK_Unigene_042818;BMK_Unigene_044187;BMK_Unigene_045698;BMK_Unigene_045755;BMK_Unigene_046143;BMK_Unigene_046255;BMK_Unigene_046934;…	K22846+K01850+K01738+K00850+K00850+K15227+K00600+K13832+K14677+K01834+K00766+K01915+K01915+K14682+K10206+K01915+K01695+K01803+K22846+K01754+K01915+K00215+K00600+K01623+K13832+K10206+K14454+K00789+K01754+K13832+K05359+K01850+K01653+K14152+K01915+K01803+K13832+K01915+K01653+K00927+K01953
Ascorbate and aldarate metabolism	ko00053	19	222	1236	16445	BMK_Unigene_006094;BMK_Unigene_008578;BMK_Unigene_016273;BMK_Unigene_023903;BMK_Unigene_035133;BMK_Unigene_035256;BMK_Unigene_036205;BMK_Unigene_037520;BMK_Unigene_041995;BMK_Unigene_042823;BMK_Unigene_047458;BMK_Unigene_048096;BMK_Unigene_049978;BMK_Unigene_063487;BMK_Unigene_067056;BMK_Unigene_076242;BMK_Unigene_084496;BMK_Unigene_092341;BMK_Unigene_101178	K00103+K10047+K00423+K00128+K00469+K00434+K00423+K00423+K00128+K00469+K16190+K00103+K00469+K00128+K21888+K00434+K00128+K12447+K14190
Cell cycle - yeast	ko04111	1	7	1236	16445	BMK_Unigene_091539	K06653
Endocytosis	ko04144	42	617	1236	16445	BMK_Unigene_001753;BMK_Unigene_008932;BMK_Unigene_010194;BMK_Unigene_011112;BMK_Unigene_011891;BMK_Unigene_014729;BMK_Unigene_014917;BMK_Unigene_017594;BMK_Unigene_018572;BMK_Unigene_021106;BMK_Unigene_021624;BMK_Unigene_036291;BMK_Unigene_043024;BMK_Unigene_043198;BMK_Unigene_046902;BMK_Unigene_047582;BMK_Unigene_048036;BMK_Unigene_048524;BMK_Unigene_049010;BMK_Unigene_062382;BMK_Unigene_063824;…	K00889+K12472+K03283+K01115+K07904+K19476+K07897+K00889+K07897+K12182+K19476+K12198+K12486+K12472+K03283+K18441+K03283+K03283+K01115+K01115+K07904+K07937+K07897+K19476+K07904+K03283+K07904+K19476+K01528+K03283+K12471+K03283+K03283+K12472+K07904+K05758+K03283+K01115+K03283+K03283+K12483+K03283
Proteasome	ko03050	2	154	1236	16445	BMK_Unigene_045383;BMK_Unigene_046282	K03029+K02735
RNA polymerase	ko03020	8	168	1236	16445	BMK_Unigene_003083;BMK_Unigene_006008;BMK_Unigene_018154;BMK_Unigene_022607;BMK_Unigene_023876;BMK_Unigene_049504;BMK_Unigene_086286;BMK_Unigene_092779	K03006+K03006+K03013+K03006+K03006+K03006+K03006+K03009
Hippo signaling pathway	ko04390	1	10	1236	16445	BMK_Unigene_092920	K06685
Protein export	ko03060	10	146	1236	16445	BMK_Unigene_001742;BMK_Unigene_015476;BMK_Unigene_015508;BMK_Unigene_015747;BMK_Unigene_019603;BMK_Unigene_044146;BMK_Unigene_047995;BMK_Unigene_063439;BMK_Unigene_071207;BMK_Unigene_091326	K09490+K03106+K12272+K09490+K03070+K10956+K12947+K09481+K10956+K10956
Quorum sensing	ko02024	1	15	1236	16445	BMK_Unigene_090882	K01218
Amino sugar and nucleotide sugar metabolism	ko00520	42	489	1236	16445	BMK_Unigene_001803;BMK_Unigene_012199;BMK_Unigene_014928;BMK_Unigene_018107;BMK_Unigene_018108;BMK_Unigene_018220;BMK_Unigene_018286;BMK_Unigene_019034;BMK_Unigene_019116;BMK_Unigene_020499;BMK_Unigene_021817;BMK_Unigene_021818;BMK_Unigene_022061;BMK_Unigene_022622;BMK_Unigene_023695;BMK_Unigene_035442;BMK_Unigene_038071;BMK_Unigene_041121;BMK_Unigene_043196;BMK_Unigene_043389;BMK_Unigene_043424;…	K15920+K00975+K01209+K13379+K13379+K12450+K01711+K12449+K00326+K01810+K01183+K01183+K00975+K00975+K01209+K00972+K00975+K05305+K08679+K08678+K12373+K01183+K00963+K01183+K16190+K01183+K01183+K00963+K00975+K12451+K01209+K08678+K01183+K00963+K12449+K01183+K20547+K12449+K01183+K20547+K00770+K12447
Human T-cell leukemia virus 1 infection	ko05166	1	26	1236	16445	BMK_Unigene_068912	K15305
Glycosylphosphatidylinositol (GPI)-anchor biosynthesis	ko00563	7	76	1236	16445	BMK_Unigene_011126;BMK_Unigene_035440;BMK_Unigene_042840;BMK_Unigene_046699;BMK_Unigene_047417;BMK_Unigene_089443;BMK_Unigene_092996	K03860+K03860+K05287+K05287+K05285+K03861+K03860
Circadian rhythm - fly	ko04711	1	4	1236	16445	BMK_Unigene_044713	K23643
Fluorobenzoate degradation	ko00364	2	5	1236	16445	BMK_Unigene_009205;BMK_Unigene_013589	K01061+K01061
Pentose and glucuronate interconversions	ko00040	53	349	1236	16445	BMK_Unigene_000852;BMK_Unigene_005151;BMK_Unigene_010663;BMK_Unigene_010699;BMK_Unigene_012342;BMK_Unigene_014007;BMK_Unigene_018612;BMK_Unigene_019066;BMK_Unigene_020889;BMK_Unigene_021913;BMK_Unigene_022525;BMK_Unigene_024375;BMK_Unigene_035930;BMK_Unigene_037696;BMK_Unigene_038151;BMK_Unigene_038609;BMK_Unigene_039002;BMK_Unigene_039756;BMK_Unigene_042591;BMK_Unigene_043378;BMK_Unigene_043544;…	K01051+K01051+K01051+K01051+K01051+K01051+K01051+K01213+K01213+K00002+K01051+K01051+K01213+K01184+K01051+K01051+K01728+K01728+K01051+K01051+K01728+K00963+K01213+K01051+K01184+K16190+K01213+K00963+K01051+K01213+K01728+K01213+K01051+K01728+K01728+K01051+K01051+K01051+K01184+K01805+K01728+K01213+K00002+K01213+K00963+K01728+K01051+K17818+K01051+K01051+K01184+K01728+K12447
Galactose metabolism	ko00052	23	309	1236	16445	BMK_Unigene_000480;BMK_Unigene_006364;BMK_Unigene_008362;BMK_Unigene_019932;BMK_Unigene_021251;BMK_Unigene_024163;BMK_Unigene_043973;BMK_Unigene_045946;BMK_Unigene_045947;BMK_Unigene_047764;BMK_Unigene_062703;BMK_Unigene_064895;BMK_Unigene_065252;BMK_Unigene_065494;BMK_Unigene_068025;BMK_Unigene_068518;BMK_Unigene_081771;BMK_Unigene_085384;BMK_Unigene_086537;BMK_Unigene_087639;BMK_Unigene_089320;…	K04618+K00850+K00850+K07407+K01785+K07407+K18819+K00963+K06617+K00963+K06617+K12309+K12309+K01193+K12309+K07407+K00963+K12309+K07407+K12309+K06617+K01229+K12447
Steroid biosynthesis	ko00100	7	82	1236	16445	BMK_Unigene_009931;BMK_Unigene_020163;BMK_Unigene_035674;BMK_Unigene_035999;BMK_Unigene_042946;BMK_Unigene_072329;BMK_Unigene_086414	K09832+K00222+K00223+K01052+K00222+K09828+K00222
Salmonella infection	ko05132	1	52	1236	16445	BMK_Unigene_047582	K18441
Glycerophospholipid metabolism	ko00564	30	317	1236	16445	BMK_Unigene_010246;BMK_Unigene_011112;BMK_Unigene_011502;BMK_Unigene_013408;BMK_Unigene_014663;BMK_Unigene_016469;BMK_Unigene_019328;BMK_Unigene_021910;BMK_Unigene_022475;BMK_Unigene_022488;BMK_Unigene_022989;BMK_Unigene_040019;BMK_Unigene_043157;BMK_Unigene_044481;BMK_Unigene_047543;BMK_Unigene_048287;BMK_Unigene_049010;BMK_Unigene_062382;BMK_Unigene_063267;BMK_Unigene_063282;BMK_Unigene_065297;…	K06130+K01115+K01114+K05929+K00995+K00967+K00006+K01517+K01126+K13510+K16369+K15728+K06130+K05929+K07029+K01126+K01115+K01115+K00901+K16818+K18693+K00901+K00901+K18696+K13523+K00901+K13519+K01115+K22389+K01613
Butanoate metabolism	ko00650	7	93	1236	16445	BMK_Unigene_005625;BMK_Unigene_009649;BMK_Unigene_044742;BMK_Unigene_063578;BMK_Unigene_081684;BMK_Unigene_085662;BMK_Unigene_090099	K01640+K01640+K18121+K01580+K01653+K00109+K01653
Tropane, piperidine and pyridine alkaloid biosynthesis	ko00960	5	76	1236	16445	BMK_Unigene_020886;BMK_Unigene_045648;BMK_Unigene_048567;BMK_Unigene_066043;BMK_Unigene_093311	K00815+K08081+K00815+K14454+K08081
Autophagy - other	ko04136	5	101	1236	16445	BMK_Unigene_016048;BMK_Unigene_018474;BMK_Unigene_023655;BMK_Unigene_048797;BMK_Unigene_049546	K08266+K08333+K08334+K08266+K08341
Sesquiterpenoid and triterpenoid biosynthesis	ko00909	7	78	1236	16445	BMK_Unigene_001075;BMK_Unigene_021087;BMK_Unigene_048640;BMK_Unigene_049527;BMK_Unigene_087497;BMK_Unigene_087906;BMK_Unigene_089137	K15803+K15803+K15803+K20659+K15803+K15803+K15891
2-Oxocarboxylic acid metabolism	ko01210	7	208	1236	16445	BMK_Unigene_018084;BMK_Unigene_041840;BMK_Unigene_066043;BMK_Unigene_071031;BMK_Unigene_081684;BMK_Unigene_090099;BMK_Unigene_092539	K14677+K14682+K14454+K11820+K01653+K01653+K12153
Glycine, serine and threonine metabolism	ko00260	12	206	1236	16445	BMK_Unigene_012439;BMK_Unigene_020813;BMK_Unigene_022001;BMK_Unigene_043571;BMK_Unigene_043705;BMK_Unigene_045698;BMK_Unigene_046255;BMK_Unigene_049165;BMK_Unigene_067976;BMK_Unigene_081497;BMK_Unigene_087746;BMK_Unigene_088279	K00600+K12235+K01834+K00018+K00605+K01695+K01754+K00600+K01754+K00108+K15918+K00108
Citrate cycle (TCA cycle)	ko00020	5	209	1236	16445	BMK_Unigene_015702;BMK_Unigene_020984;BMK_Unigene_041239;BMK_Unigene_068505;BMK_Unigene_072657	K00162+K00627+K01648+K00627+K00025
Peptidoglycan biosynthesis	ko00550	1	6	1236	16445	BMK_Unigene_091316	K01921
D-Glutamine and D-glutamate metabolism	ko00471	1	5	1236	16445	BMK_Unigene_091316	K01921
Pentose phosphate pathway	ko00030	10	179	1236	16445	BMK_Unigene_006364;BMK_Unigene_008362;BMK_Unigene_011453;BMK_Unigene_020499;BMK_Unigene_039082;BMK_Unigene_044184;BMK_Unigene_049750;BMK_Unigene_069731;BMK_Unigene_091613;BMK_Unigene_101271	K00850+K00850+K03841+K01810+K00036+K03841+K01623+K03841+K03841+K03841
Fructose and mannose metabolism	ko00051	15	203	1236	16445	BMK_Unigene_006364;BMK_Unigene_008362;BMK_Unigene_011453;BMK_Unigene_018286;BMK_Unigene_018538;BMK_Unigene_041121;BMK_Unigene_044184;BMK_Unigene_045755;BMK_Unigene_049750;BMK_Unigene_069731;BMK_Unigene_070444;BMK_Unigene_085356;BMK_Unigene_090882;BMK_Unigene_091613;BMK_Unigene_101271	K00850+K00850+K03841+K01711+K19355+K05305+K03841+K01803+K01623+K03841+K01805+K01803+K01218+K03841+K03841
Nucleotide excision repair	ko03420	9	147	1236	16445	BMK_Unigene_017741;BMK_Unigene_020568;BMK_Unigene_042169;BMK_Unigene_066062;BMK_Unigene_068756;BMK_Unigene_070168;BMK_Unigene_072381;BMK_Unigene_084765;BMK_Unigene_092726	K10839+K10739+K10843+K07466+K06634+K10570+K03505+K10845+K07466
Basal transcription factors	ko03022	7	117	1236	16445	BMK_Unigene_039543;BMK_Unigene_042169;BMK_Unigene_044397;BMK_Unigene_044989;BMK_Unigene_068373;BMK_Unigene_068756;BMK_Unigene_084765	K03128+K10843+K03135+K03133+K03122+K06634+K10845
Phenylalanine, tyrosine and tryptophan biosynthesis	ko00400	13	155	1236	16445	BMK_Unigene_004871;BMK_Unigene_008448;BMK_Unigene_013685;BMK_Unigene_020886;BMK_Unigene_023419;BMK_Unigene_045698;BMK_Unigene_048567;BMK_Unigene_063894;BMK_Unigene_066043;BMK_Unigene_069894;BMK_Unigene_070108;BMK_Unigene_070117;BMK_Unigene_089154	K01850+K15227+K13832+K00815+K00766+K01695+K00815+K13832+K14454+K13832+K05359+K01850+K13832
One carbon pool by folate	ko00670	7	79	1236	16445	BMK_Unigene_012439;BMK_Unigene_043705;BMK_Unigene_048738;BMK_Unigene_049165;BMK_Unigene_086929;BMK_Unigene_091955;BMK_Unigene_092115	K00600+K00605+K00602+K00600+K01433+K00602+K13998
Stilbenoid, diarylheptanoid and gingerol biosynthesis	ko00945	5	76	1236	16445	BMK_Unigene_002710;BMK_Unigene_042336;BMK_Unigene_045228;BMK_Unigene_081432;BMK_Unigene_090982	K16040+K13065+K16040+K16040+K13065
Flavonoid biosynthesis	ko00941	14	140	1236	16445	BMK_Unigene_006798;BMK_Unigene_017819;BMK_Unigene_023991;BMK_Unigene_040097;BMK_Unigene_042336;BMK_Unigene_047531;BMK_Unigene_063646;BMK_Unigene_063968;BMK_Unigene_070030;BMK_Unigene_070318;BMK_Unigene_070794;BMK_Unigene_081583;BMK_Unigene_090982;BMK_Unigene_091874	K08695+K01859+K13083+K00660+K13065+K05280+K05277+K01859+K13082+K00660+K05278+K01859+K13065+K05278
Folate biosynthesis	ko00790	5	76	1236	16445	BMK_Unigene_040099;BMK_Unigene_046220;BMK_Unigene_048494;BMK_Unigene_068449;BMK_Unigene_092115	K00079+K14652+K01495+K13950+K13998
Photosynthesis - antenna proteins	ko00196	4	58	1236	16445	BMK_Unigene_044783;BMK_Unigene_066361;BMK_Unigene_085403;BMK_Unigene_088313	K08913+K08913+K08917+K08912
Cyanoamino acid metabolism	ko00460	12	138	1236	16445	BMK_Unigene_012439;BMK_Unigene_039994;BMK_Unigene_046789;BMK_Unigene_046988;BMK_Unigene_048724;BMK_Unigene_049165;BMK_Unigene_062780;BMK_Unigene_070064;BMK_Unigene_072225;BMK_Unigene_086143;BMK_Unigene_087903;BMK_Unigene_092539	K00600+K05350+K01188+K05349+K01188+K00600+K13051+K01188+K18592+K01188+K01188+K12153
Methane metabolism	ko00680	2	33	1236	16445	BMK_Unigene_043571;BMK_Unigene_086493	K00018+K00121
Oxidative phosphorylation	ko00190	27	495	1236	16445	BMK_Unigene_013996;BMK_Unigene_014651;BMK_Unigene_016256;BMK_Unigene_017225;BMK_Unigene_019938;BMK_Unigene_022766;BMK_Unigene_023663;BMK_Unigene_023848;BMK_Unigene_035287;BMK_Unigene_035288;BMK_Unigene_035420;BMK_Unigene_043045;BMK_Unigene_043046;BMK_Unigene_046962;BMK_Unigene_066280;BMK_Unigene_068740;BMK_Unigene_070801;BMK_Unigene_071418;BMK_Unigene_076066;BMK_Unigene_081616;BMK_Unigene_085009;…	K02261+K03661+K05584+K02256+K00412+K03881+K02154+K02256+K01535+K01535+K01535+K01535+K01535+K02146+K02258+K01507+K02259+K03942+K03955+K01535+K03878+K02128+K02132+K03879+K02113+K02262+K02126
C5-Branched dibasic acid metabolism	ko00660	2	26	1236	16445	BMK_Unigene_081684;BMK_Unigene_090099	K01653+K01653
Plant hormone signal transduction	ko04075	71	779	1236	16445	BMK_Unigene_000394;BMK_Unigene_001959;BMK_Unigene_003939;BMK_Unigene_004079;BMK_Unigene_005715;BMK_Unigene_007098;BMK_Unigene_007287;BMK_Unigene_007907;BMK_Unigene_009615;BMK_Unigene_010416;BMK_Unigene_011654;BMK_Unigene_013964;BMK_Unigene_018050;BMK_Unigene_018661;BMK_Unigene_022103;BMK_Unigene_023116;BMK_Unigene_024236;BMK_Unigene_032748;BMK_Unigene_035274;BMK_Unigene_042042;BMK_Unigene_042274;…	K14487+K13946+K12126+K13449+K14432+K13415+K14503+K14495+K13422+K14488+K14493+K14494+K13422+K13449+K13415+K13416+K13449+K14515+K13463+K14497+K14494+K13422+K14498+K14492+K14500+K14506+K14432+K14516+K13415+K14485+K14494+K16189+K14492+K13422+K13416+K14488+K14432+K14488+K14486+K14488+K14487+K13415+K14488+K14489+K13946+K14496+K14484+K13422+K14508+K14486+K14514+K14497+K13422+K13946+K14494+K12126+K14510+…
Fatty acid elongation	ko00062	12	97	1236	16445	BMK_Unigene_004866;BMK_Unigene_012895;BMK_Unigene_014559;BMK_Unigene_022266;BMK_Unigene_022897;BMK_Unigene_038037;BMK_Unigene_038038;BMK_Unigene_043266;BMK_Unigene_048389;BMK_Unigene_059793;BMK_Unigene_088234;BMK_Unigene_090157	K10246+K15397+K15397+K15397+K01068+K15397+K15397+K15397+K15397+K15397+K10246+K15397
Riboflavin metabolism	ko00740	6	65	1236	16445	BMK_Unigene_041474;BMK_Unigene_045831;BMK_Unigene_046220;BMK_Unigene_047988;BMK_Unigene_066442;BMK_Unigene_087513	K14379+K11752+K14652+K21064+K00953+K00953
Drug metabolism - cytochrome P450	ko00982	3	32	1236	16445	BMK_Unigene_001892;BMK_Unigene_007721;BMK_Unigene_071566	K00485+K00485+K00485
Apoptosis	ko04210	1	28	1236	16445	BMK_Unigene_092981	K04725
Pyruvate metabolism	ko00620	14	306	1236	16445	BMK_Unigene_006695;BMK_Unigene_013360;BMK_Unigene_015702;BMK_Unigene_018499;BMK_Unigene_020984;BMK_Unigene_023903;BMK_Unigene_040719;BMK_Unigene_041995;BMK_Unigene_063487;BMK_Unigene_068505;BMK_Unigene_070595;BMK_Unigene_072657;BMK_Unigene_084496;BMK_Unigene_089323	K01512+K01595+K00162+K00029+K00627+K00128+K00029+K00128+K00128+K00627+K00102+K00025+K00128+K00029
Necroptosis	ko04217	2	28	1236	16445	BMK_Unigene_085672;BMK_Unigene_092981	K17065+K04725
Carotenoid biosynthesis	ko00906	8	110	1236	16445	BMK_Unigene_022961;BMK_Unigene_045368;BMK_Unigene_047636;BMK_Unigene_048607;BMK_Unigene_064053;BMK_Unigene_071445;BMK_Unigene_072038;BMK_Unigene_091506	K09842+K09843+K14595+K09840+K09841+K09835+K09841+K09835
Pantothenate and CoA biosynthesis	ko00770	8	137	1236	16445	BMK_Unigene_022935;BMK_Unigene_023903;BMK_Unigene_041995;BMK_Unigene_063487;BMK_Unigene_071109;BMK_Unigene_081684;BMK_Unigene_084496;BMK_Unigene_090099	K01598+K00128+K00128+K00128+K01598+K01653+K00128+K01653
Inositol phosphate metabolism	ko00562	31	293	1236	16445	BMK_Unigene_001753;BMK_Unigene_004644;BMK_Unigene_007128;BMK_Unigene_007302;BMK_Unigene_008578;BMK_Unigene_011502;BMK_Unigene_015684;BMK_Unigene_015687;BMK_Unigene_015992;BMK_Unigene_017594;BMK_Unigene_018526;BMK_Unigene_018836;BMK_Unigene_023899;BMK_Unigene_035133;BMK_Unigene_042823;BMK_Unigene_043183;BMK_Unigene_045745;BMK_Unigene_045755;BMK_Unigene_046866;BMK_Unigene_047482;BMK_Unigene_049978;…	K00889+K01110+K00140+K10572+K10047+K01114+K18082+K22913+K24221+K00889+K05857+K00010+K00140+K00469+K00469+K01858+K18082+K01803+K01099+K01765+K00469+K03103+K01858+K24221+K01803+K01858+K18082+K18081+K10572+K00140+K00140
Phagosome	ko04145	18	325	1236	16445	BMK_Unigene_014651;BMK_Unigene_014917;BMK_Unigene_016679;BMK_Unigene_017493;BMK_Unigene_018572;BMK_Unigene_021106;BMK_Unigene_023663;BMK_Unigene_024276;BMK_Unigene_043184;BMK_Unigene_044146;BMK_Unigene_046962;BMK_Unigene_063439;BMK_Unigene_065418;BMK_Unigene_066284;BMK_Unigene_071207;BMK_Unigene_091320;BMK_Unigene_091326;BMK_Unigene_092010	K03661+K07897+K05692+K07374+K07897+K12182+K02154+K07375+K07375+K10956+K02146+K09481+K07374+K07897+K10956+K05692+K10956+K01365
Ribosome	ko03010	20	786	1236	16445	BMK_Unigene_000983;BMK_Unigene_001591;BMK_Unigene_010388;BMK_Unigene_010433;BMK_Unigene_015106;BMK_Unigene_016848;BMK_Unigene_017643;BMK_Unigene_017966;BMK_Unigene_019913;BMK_Unigene_020101;BMK_Unigene_022157;BMK_Unigene_023417;BMK_Unigene_043553;BMK_Unigene_083431;BMK_Unigene_086753;BMK_Unigene_088975;BMK_Unigene_089391;BMK_Unigene_090500;BMK_Unigene_092637;BMK_Unigene_093372	K02934+K02922+K02904+K02990+K02925+K02942+K02867+K02990+K02908+K02892+K02995+K02982+K02996+K02891+K02930+K02925+K02899+K02901+K02995+K02942
Streptomycin biosynthesis	ko00521	1	4	1236	16445	BMK_Unigene_018836	K00010
MAPK signaling pathway - plant	ko04016	55	540	1236	16445	BMK_Unigene_000340;BMK_Unigene_004079;BMK_Unigene_007478;BMK_Unigene_009615;BMK_Unigene_009638;BMK_Unigene_010410;BMK_Unigene_017266;BMK_Unigene_017335;BMK_Unigene_017415;BMK_Unigene_017557;BMK_Unigene_018050;BMK_Unigene_018661;BMK_Unigene_018835;BMK_Unigene_019761;BMK_Unigene_023116;BMK_Unigene_023855;BMK_Unigene_024005;BMK_Unigene_024236;BMK_Unigene_032748;BMK_Unigene_036508;BMK_Unigene_037917;…	K20772+K13449+K20536+K13422+K13425+K20717+K13420+K20558+K13447+K20772+K13422+K13449+K13424+K13424+K13416+K20553+K02183+K13449+K14515+K20558+K13420+K13424+K20717+K20716+K20716+K14497+K13422+K14498+K13425+K14516+K20600+K13422+K13416+K20558+K13420+K13424+K14496+K20600+K13422+K13424+K13425+K14514+K20557+K14497+K13422+K14510+K20547+K13416+K13424+K20535+K13416+K13424+K20547+K13420+K13420
Diterpenoid biosynthesis	ko00904	7	41	1236	16445	BMK_Unigene_008411;BMK_Unigene_019792;BMK_Unigene_041909;BMK_Unigene_041910;BMK_Unigene_046731;BMK_Unigene_047760;BMK_Unigene_092957	K05282+K04125+K04125+K04125+K04125+K13070+K04121
Photosynthesis	ko00195	5	162	1236	16445	BMK_Unigene_003397;BMK_Unigene_085880;BMK_Unigene_087498;BMK_Unigene_092786;BMK_Unigene_092791	K02636+K03541+K02717+K02113+K02695
Degradation of aromatic compounds	ko01220	1	27	1236	16445	BMK_Unigene_086493	K00121
Vitamin B6 metabolism	ko00750	2	40	1236	16445	BMK_Unigene_071324;BMK_Unigene_090833	K23998+K23998
Hippo signaling pathway - fly	ko04391	1	13	1236	16445	BMK_Unigene_091320	K05692
Nitrogen metabolism	ko00910	12	90	1236	16445	BMK_Unigene_010586;BMK_Unigene_016323;BMK_Unigene_017272;BMK_Unigene_017823;BMK_Unigene_034813;BMK_Unigene_037506;BMK_Unigene_042706;BMK_Unigene_044187;BMK_Unigene_046934;BMK_Unigene_084710;BMK_Unigene_089854;BMK_Unigene_090391	K00261+K00261+K00262+K01725+K01915+K01915+K00261+K01915+K01915+K01915+K01915+K00261
Monobactam biosynthesis	ko00261	3	26	1236	16445	BMK_Unigene_045759;BMK_Unigene_048653;BMK_Unigene_068338	K13811+K00215+K13811
Hippo signaling pathway - multiple species	ko04392	1	6	1236	16445	BMK_Unigene_092920	K06685
D-Alanine metabolism	ko00473	1	4	1236	16445	BMK_Unigene_091316	K01921
Phenylalanine metabolism	ko00360	4	112	1236	16445	BMK_Unigene_020886;BMK_Unigene_048567;BMK_Unigene_063457;BMK_Unigene_066043	K00815+K00815+K00457+K14454
Plant-pathogen interaction	ko04626	117	950	1236	16445	BMK_Unigene_000566;BMK_Unigene_001165;BMK_Unigene_001330;BMK_Unigene_003648;BMK_Unigene_004404;BMK_Unigene_004416;BMK_Unigene_004812;BMK_Unigene_005818;BMK_Unigene_006432;BMK_Unigene_007130;BMK_Unigene_007478;BMK_Unigene_009194;BMK_Unigene_009638;BMK_Unigene_010838;BMK_Unigene_011064;BMK_Unigene_012895;BMK_Unigene_014559;BMK_Unigene_016054;BMK_Unigene_016179;BMK_Unigene_017266;BMK_Unigene_017331;…	K18878+K04079+K13429+K13466+K13412+K13436+K13459+K13448+K01373+K13429+K20536+K18834+K13425+K13448+K13448+K15397+K15397+K13430+K13448+K13420+K18834+K13447+K13449+K13424+K13459+K13424+K18834+K13435+K18878+K05391+K13435+K13430+K13430+K13457+K15397+K13430+K16225+K13416+K13459+K13457+K13459+K13435+K02183+K13449+K18835+K13420+K15397+K15397+K18835+K13424+K18834+K13448+K15397+K13430+K13435+K13430+K13436+…
Tyrosine metabolism	ko00350	7	138	1236	16445	BMK_Unigene_020886;BMK_Unigene_048567;BMK_Unigene_063457;BMK_Unigene_066043;BMK_Unigene_084691;BMK_Unigene_086493;BMK_Unigene_092610	K00815+K00815+K00457+K14454+K22203+K00121+K00505
Benzoxazinoid biosynthesis	ko00402	4	25	1236	16445	BMK_Unigene_042142;BMK_Unigene_064096;BMK_Unigene_086027;BMK_Unigene_087960	K13229+K13229+K13229+K13229
alpha-Linolenic acid metabolism	ko00592	18	155	1236	16445	BMK_Unigene_000828;BMK_Unigene_010155;BMK_Unigene_018491;BMK_Unigene_018609;BMK_Unigene_019905;BMK_Unigene_021543;BMK_Unigene_035786;BMK_Unigene_041600;BMK_Unigene_045316;BMK_Unigene_063282;BMK_Unigene_066959;BMK_Unigene_067334;BMK_Unigene_068119;BMK_Unigene_068144;BMK_Unigene_071454;BMK_Unigene_081266;BMK_Unigene_091187;BMK_Unigene_092542	K08241+K00454+K00454+K01723+K00224+K08241+K00454+K10525+K01723+K16818+K10527+K00224+K08241+K00454+K08241+K00232+K22389+K08241
Arginine and proline metabolism	ko00330	14	205	1236	16445	BMK_Unigene_007727;BMK_Unigene_008074;BMK_Unigene_022700;BMK_Unigene_023903;BMK_Unigene_041995;BMK_Unigene_045143;BMK_Unigene_062466;BMK_Unigene_063487;BMK_Unigene_064157;BMK_Unigene_066043;BMK_Unigene_080930;BMK_Unigene_084496;BMK_Unigene_089502;BMK_Unigene_093094	K00472+K00934+K00797+K00128+K00128+K01583+K01611+K00128+K00472+K14454+K01583+K00128+K01583+K00797
Glycosphingolipid biosynthesis - ganglio series	ko00604	6	84	1236	16445	BMK_Unigene_043424;BMK_Unigene_064895;BMK_Unigene_065252;BMK_Unigene_068025;BMK_Unigene_085384;BMK_Unigene_087639	K12373+K12309+K12309+K12309+K12309+K12309
Glycerolipid metabolism	ko00561	31	275	1236	16445	BMK_Unigene_015622;BMK_Unigene_019932;BMK_Unigene_020800;BMK_Unigene_021913;BMK_Unigene_023903;BMK_Unigene_024163;BMK_Unigene_039107;BMK_Unigene_040019;BMK_Unigene_041295;BMK_Unigene_041995;BMK_Unigene_043220;BMK_Unigene_045012;BMK_Unigene_047543;BMK_Unigene_048131;BMK_Unigene_048473;BMK_Unigene_062392;BMK_Unigene_063267;BMK_Unigene_063487;BMK_Unigene_065297;BMK_Unigene_068518;BMK_Unigene_070501;…	K00679+K07407+K03715+K00002+K00128+K07407+K00679+K15728+K01046+K00128+K00679+K00679+K07029+K00679+K00679+K00679+K00901+K00128+K18693+K07407+K00901+K00002+K00128+K00901+K07407+K15918+K13523+K00901+K00679+K13519+K00679
Other glycan degradation	ko00511	12	172	1236	16445	BMK_Unigene_010345;BMK_Unigene_023194;BMK_Unigene_023523;BMK_Unigene_043168;BMK_Unigene_043424;BMK_Unigene_048658;BMK_Unigene_064895;BMK_Unigene_065252;BMK_Unigene_068025;BMK_Unigene_085384;BMK_Unigene_087639;BMK_Unigene_090985	K01192+K01227+K01191+K01206+K12373+K01227+K12309+K12309+K12309+K12309+K12309+K01444
Ribosome biogenesis in eukaryotes	ko03008	14	251	1236	16445	BMK_Unigene_004543;BMK_Unigene_012619;BMK_Unigene_018939;BMK_Unigene_020671;BMK_Unigene_040906;BMK_Unigene_040961;BMK_Unigene_049096;BMK_Unigene_049111;BMK_Unigene_065734;BMK_Unigene_069247;BMK_Unigene_072120;BMK_Unigene_082615;BMK_Unigene_092695;BMK_Unigene_092696	K01164+K14548+K14566+K14574+K14556+K18532+K06943+K14537+K14570+K03097+K14544+K14570+K14572+K18532
Cysteine and methionine metabolism	ko00270	24	319	1236	16445	BMK_Unigene_000340;BMK_Unigene_000633;BMK_Unigene_001298;BMK_Unigene_006064;BMK_Unigene_008981;BMK_Unigene_017557;BMK_Unigene_018876;BMK_Unigene_020886;BMK_Unigene_022700;BMK_Unigene_036916;BMK_Unigene_046143;BMK_Unigene_046702;BMK_Unigene_048444;BMK_Unigene_048567;BMK_Unigene_062466;BMK_Unigene_066043;BMK_Unigene_067889;BMK_Unigene_069744;BMK_Unigene_071936;BMK_Unigene_072657;BMK_Unigene_088283;…	K20772+K00558+K22846+K01738+K00837+K20772+K00837+K00815+K00797+K00837+K22846+K22207+K05396+K00815+K01611+K14454+K00789+K01251+K00547+K00025+K05933+K01761+K05933+K00797
mTOR signaling pathway	ko04150	3	45	1236	16445	BMK_Unigene_012857;BMK_Unigene_045945;BMK_Unigene_089301	K08272+K02677+K02677
Insect hormone biosynthesis	ko00981	1	10	1236	16445	BMK_Unigene_083622	K10719
Protein processing in endoplasmic reticulum	ko04141	56	733	1236	16445	BMK_Unigene_001165;BMK_Unigene_001742;BMK_Unigene_003455;BMK_Unigene_008378;BMK_Unigene_010194;BMK_Unigene_010710;BMK_Unigene_015571;BMK_Unigene_015747;BMK_Unigene_017022;BMK_Unigene_017741;BMK_Unigene_021052;BMK_Unigene_022841;BMK_Unigene_035212;BMK_Unigene_040740;BMK_Unigene_042238;BMK_Unigene_042509;BMK_Unigene_043134;BMK_Unigene_043489;BMK_Unigene_044146;BMK_Unigene_044227;BMK_Unigene_046902;…	K04079+K09490+K13993+K06689+K03283+K14007+K09503+K09490+K14009+K10839+K23741+K14011+K12666+K13989+K06689+K04523+K10666+K06689+K10956+K10085+K03283+K03283+K03283+K09503+K12666+K14007+K14014+K09481+K14005+K07151+K10085+K03283+K03283+K01456+K06689+K01456+K03283+K10956+K03283+K14007+K03283+K01456+K13993+K04079+K09580+K09580+K10956+K14012+K08852+K03283+K03283+K07953+K03283+K10575+K12666+K13993
Viral carcinogenesis	ko05203	2	20	1236	16445	BMK_Unigene_014093;BMK_Unigene_068912	K11252+K15305
Ras signaling pathway	ko04014	1	17	1236	16445	BMK_Unigene_047397	K17630
Alanine, aspartate and glutamate metabolism	ko00250	16	192	1236	16445	BMK_Unigene_010586;BMK_Unigene_016323;BMK_Unigene_016498;BMK_Unigene_017272;BMK_Unigene_034813;BMK_Unigene_037506;BMK_Unigene_042706;BMK_Unigene_044187;BMK_Unigene_046934;BMK_Unigene_062780;BMK_Unigene_063578;BMK_Unigene_066043;BMK_Unigene_084710;BMK_Unigene_089854;BMK_Unigene_090391;BMK_Unigene_090896	K00261+K00261+K01756+K00262+K01915+K01915+K00261+K01915+K01915+K13051+K01580+K14454+K01915+K01915+K00261+K01953
Glycolysis / Gluconeogenesis	ko00010	27	427	1236	16445	BMK_Unigene_006364;BMK_Unigene_008362;BMK_Unigene_011453;BMK_Unigene_015702;BMK_Unigene_020499;BMK_Unigene_020984;BMK_Unigene_021251;BMK_Unigene_021908;BMK_Unigene_021913;BMK_Unigene_022001;BMK_Unigene_023903;BMK_Unigene_039199;BMK_Unigene_041995;BMK_Unigene_044184;BMK_Unigene_045755;BMK_Unigene_049750;BMK_Unigene_063487;BMK_Unigene_065044;BMK_Unigene_068505;BMK_Unigene_069731;BMK_Unigene_072264;…	K00850+K00850+K03841+K00162+K01810+K00627+K01785+K01792+K00002+K01834+K00128+K01792+K00128+K03841+K01803+K01623+K00128+K03103+K00627+K03841+K00002+K00128+K01803+K00121+K00927+K03841+K03841
Taurine and hypotaurine metabolism	ko00430	2	14	1236	16445	BMK_Unigene_063578;BMK_Unigene_072225	K01580+K18592
NOD-like receptor signaling pathway	ko04621	2	34	1236	16445	BMK_Unigene_085672;BMK_Unigene_092981	K17065+K04725
Fatty acid degradation	ko00071	14	198	1236	16445	BMK_Unigene_012810;BMK_Unigene_020782;BMK_Unigene_023903;BMK_Unigene_041995;BMK_Unigene_063487;BMK_Unigene_064814;BMK_Unigene_066959;BMK_Unigene_068235;BMK_Unigene_071119;BMK_Unigene_072113;BMK_Unigene_081266;BMK_Unigene_084496;BMK_Unigene_086493;BMK_Unigene_089027	K15401+K01897+K00128+K00128+K00128+K01897+K10527+K20495+K01897+K07425+K00232+K00128+K00121+K01897
